# Supplementary material for: Purpose in life and tobacco use among community-dwelling mothers of early adolescents
Source: PubMed Central journal article supplement — BMJ Open. 2018 Apr 20;8(4):e020586. doi: 10.1136/bmjopen-2017-020586 (PMC5914705; doi:10.1136/bmjopen-2017-020586), 2018-04-20
Supplement: bmjopen-2017-020586.draft_revisions.pdf [file bmjopen-2017-020586.draft_revisions.pdf]

# BMJ Open

BMJ Open is committed to open peer review. As part of this commitment we make the peer review history of every article we publish publicly available.

When an article is published we post the peer reviewers' comments and the authors' responses online. We also post the versions of the paper that were used during peer review. These are the versions that the peer review comments apply to.

The versions of the paper that follow are the versions that were submitted during the peer review process. They are not the versions of record or the final published versions. They should not be cited or distributed as the published version of this manuscript.

BMJ Open is an open access journal and the full, final, typeset and author-corrected version of record of the manuscript is available on our site with no access controls, subscription charges or pay-per-view fees (<http://bmjopen.bmj.com>).

If you have any questions on BMJ Open's open peer review process please email [info.bmjopen@bmj.com](mailto:info.bmjopen@bmj.com)

# BMJ Open

## Purpose in life and tobacco use among community-dwelling mothers of early adolescents

|                                 |                                                                                                                                                                                                                                                                                                                                                                                                                                                                                                                                                                                                                                                                                                                                                                                                                                                                                                                                                                                                                                                                                                                                                                                                                                                                                                                                                                                                                                 |
|---------------------------------|---------------------------------------------------------------------------------------------------------------------------------------------------------------------------------------------------------------------------------------------------------------------------------------------------------------------------------------------------------------------------------------------------------------------------------------------------------------------------------------------------------------------------------------------------------------------------------------------------------------------------------------------------------------------------------------------------------------------------------------------------------------------------------------------------------------------------------------------------------------------------------------------------------------------------------------------------------------------------------------------------------------------------------------------------------------------------------------------------------------------------------------------------------------------------------------------------------------------------------------------------------------------------------------------------------------------------------------------------------------------------------------------------------------------------------|
| Journal:                        | <i>BMJ Open</i>                                                                                                                                                                                                                                                                                                                                                                                                                                                                                                                                                                                                                                                                                                                                                                                                                                                                                                                                                                                                                                                                                                                                                                                                                                                                                                                                                                                                                 |
| Manuscript ID                   | bmjopen-2017-020586                                                                                                                                                                                                                                                                                                                                                                                                                                                                                                                                                                                                                                                                                                                                                                                                                                                                                                                                                                                                                                                                                                                                                                                                                                                                                                                                                                                                             |
| Article Type:                   | Research                                                                                                                                                                                                                                                                                                                                                                                                                                                                                                                                                                                                                                                                                                                                                                                                                                                                                                                                                                                                                                                                                                                                                                                                                                                                                                                                                                                                                        |
| Date Submitted by the Author:   | 10-Nov-2017                                                                                                                                                                                                                                                                                                                                                                                                                                                                                                                                                                                                                                                                                                                                                                                                                                                                                                                                                                                                                                                                                                                                                                                                                                                                                                                                                                                                                     |
| Complete List of Authors:       | Morimoto, Yuko; Tokyo Metropolitan Institute of Medical Science, Department of Psychiatry and Behavioral Science<br>Yamasaki, Syudo; Tokyo Metropolitan Institute of Medical Science, Department of Psychiatry and Behavioral Science<br>Ando, Shuntaro; Graduate School of Medicine, The University of Tokyo, Department of Neuropsychiatry<br>Koike, Shinsuke; University of Tokyo Institute for Diversity & Adaptation of Human Mind (UTIDAHM), The University of Tokyo<br>Fujikawa, Shinya; Graduate School of Medicine, The University of Tokyo, Department of Neuropsychiatry<br>Kanata, Sho; Teikyo University School of Medicine, Department of Psychiatry<br>Endo, Kaori; Tokyo Metropolitan Institute of Medical Science, Department of Psychiatry and Behavioral Science<br>Nakanishi, Miharuru; Tokyo Metropolitan Institute of Medical Science, Department of Psychiatry and Behavioral Science<br>HATCH, STEPHANI; Institute of Psychiatry, Psychology & Neuroscience, King's College London, Department of Psychological Medicine<br>Richards, M; MRC Unit for Lifelong Health and Aging, University College London<br>Kasai, Kiyoto; Graduate School of Medicine, The University of Tokyo, Department of Neuropsychiatry<br>Hiraiwa-Hasegawa, Mariko; SOKENDAI (The Graduate University for Advanced Studies), School of Advanced Science<br>Nishida, Atsushi; Tokyo Metropolitan Institute of Medical Science, |
| <b>Primary Subject Heading</b>: | Smoking and tobacco                                                                                                                                                                                                                                                                                                                                                                                                                                                                                                                                                                                                                                                                                                                                                                                                                                                                                                                                                                                                                                                                                                                                                                                                                                                                                                                                                                                                             |
| Secondary Subject Heading:      | Addiction, Public health, Epidemiology                                                                                                                                                                                                                                                                                                                                                                                                                                                                                                                                                                                                                                                                                                                                                                                                                                                                                                                                                                                                                                                                                                                                                                                                                                                                                                                                                                                          |
| Keywords:                       | Purpose in life, Mother, Psychological distress, Tokyo Early Adolescence Survey (T-EAS), Tobacco use                                                                                                                                                                                                                                                                                                                                                                                                                                                                                                                                                                                                                                                                                                                                                                                                                                                                                                                                                                                                                                                                                                                                                                                                                                                                                                                            |
|                                 |                                                                                                                                                                                                                                                                                                                                                                                                                                                                                                                                                                                                                                                                                                                                                                                                                                                                                                                                                                                                                                                                                                                                                                                                                                                                                                                                                                                                                                 |

SCHOLARONE™  
Manuscripts

1  
2 November 10, 2017  
3

4 Dr. Trish Groves  
5 Editor-in-Chief  
6 *BMJ Open*  
7  
8  
9

10 Dear Dr. Groves,  
11

12  
13 I wish to submit an original research article for publication in *BMJ Open*, titled “Purpose in life and tobacco  
14 use among community-dwelling mothers of early adolescents.” The paper was co-authored by Yuko  
15 Morimoto, Syudo Yamasaki, Shuntaro Ando, Shinsuke Koike, Shinya Fujikawa, Sho Kanata, Kaori Endo,  
16 Miharu Nakanishi, Stephani L Hatch, Marcus Richards, Kiyoto Kasai, Mariko Hiraiwa-Hasegawa, and  
17 Atsushi Nishida.  
18  
19

20  
21 This study utilizes the results of questionnaires administered as part of the Tokyo Early Adolescence Survey to  
22 investigate the relationship between a sense of purpose in life and tobacco use among mothers of adolescents  
23 who are in early middle age. We find that there is a strong inverse relationship between a sense of purpose in  
24 life and tobacco use in this population, even after controlling for socioeconomic status indicators, age, and  
25 psychological distress. We believe that our study makes a significant contribution to the literature, because it is  
26 the first to investigate this relationship using a large population-based sample ( $N = 4,063$ ) of women in early  
27 midlife. Further, we believe that this paper will be of interest to the readership of your journal, given that our  
28 findings have practical implications for community health professionals involved in promoting tobacco  
29 cessation among mid-life women, and especially mothers.  
30  
31  
32  
33  
34

35 This manuscript has not been published or presented elsewhere in part or in entirety and is not under  
36 consideration by another journal. All study participants provided informed consent, and the study’s design was  
37 approved by the appropriate ethics review board. We have read and understood your journal’s policies, and we  
38 believe that neither the manuscript nor the study violates any of these. There are no conflicts of interest to  
39 declare.  
40  
41  
42

43 Thank you for your consideration. I look forward to hearing from you.  
44

45  
46 Sincerely,  
47

48  
49 Atsushi Nishida  
50 Department of Psychiatry and Behavioral Science,  
51 Tokyo Metropolitan Institute of Medical Science, Tokyo, Japan.  
52 Address: 2-1-6 Kamikitazawa, Setagaya-ku, Tokyo 156-8506, Japan.  
53 Tel: +81-3-6834-2296  
54 Fax: +81-3-5316-3150  
55  
56 E-mail: nishida-at@igakuken.or.jp  
57  
58  
59

1  
2  
3  
4  
5  
6  
7  
8  
9  
10  
11  
12  
13  
14  
15  
16  
17  
18  
19  
20  
21  
22  
23  
24  
25  
26  
27  
28  
29  
30  
31  
32  
33  
34  
35  
36  
37  
38  
39  
40  
41  
42  
43  
44  
45  
46  
47  
48  
49  
50  
51  
52  
53  
54  
55  
56  
57  
58  
59  
60

1 **TITLE**

2 Purpose in life and tobacco use among community-dwelling mothers of early adolescents

3  
4  
5  
6  
7  
8  
9  
10  
11 **AUTHOR NAMES AND AFFILIATIONS**

12  
13  
14 Yuko Morimoto<sup>1\*</sup>, Syudo Yamasaki<sup>1\*</sup>, Shuntaro Ando<sup>2</sup> Shinsuke Koike<sup>3</sup> Shinya Fujikawa<sup>2</sup> Sho

15  
16 Kanata<sup>4</sup> Kaori Endo<sup>1</sup> Miharu Nakanishi<sup>1</sup> Stephani L Hatch<sup>5</sup> Marcus Richards<sup>6</sup> Kiyoto Kasai<sup>2</sup> Mariko

17  
18  
19 Hiraiwa-Hasegawa<sup>7</sup> Atsushi Nishida<sup>1</sup>

20  
21  
22  
23  
24  
25 1: Department of Psychiatry and Behavioral Science, Tokyo Metropolitan Institute of Medical  
26  
27  
28 Science, Tokyo, Japan. 2-1-6 Kamikitazawa, Setagaya-ku, Tokyo 156-8506, Japan.

29  
30  
31 2: Department of Neuropsychiatry, Graduate School of Medicine, The University of Tokyo, Tokyo,  
32  
33  
34 Japan. 7-3-1 Hongo, Bunkyo-ku, Tokyo 113-8655, Japan.

35  
36  
37 3: University of Tokyo Institute for Diversity & Adaptation of Human Mind (UTIDAHM), The  
38  
39  
40 University of Tokyo, Tokyo, Japan. 3-8-1, Komaba, Meguro-ku, Tokyo 153-8902, Japan.

41  
42  
43 4: Department of Psychiatry, Teikyo University School of Medicine, Tokyo, Japan. 2-11-1 Kaga,  
44  
45  
46 Itabashi-Ku, Tokyo 173-8606, Japan.

47  
48 5: Department of Psychological Medicine, Institute of Psychiatry, Psychology & Neuroscience,  
49  
50  
51 King's College London, UK. 10 Cutcombe Road, London SE5 9RJ, UK.

52  
53  
54 6: MRC Unit for Lifelong Health and Aging, University College London, London, UK. 33 Bedford  
55  
56

20 Place, London, WC1B 5JU, UK.

21 7: School of Advanced Science, SOKENDAI (The Graduate University for Advanced Studies),  
22 Kanagawa, Japan. Shonan Village, Hayama, Kanagawa 240-0193, Japan.

23 \* Equal contributions as first author

## 25 **CORRESPONDING AUTHOR**

26 Atsushi Nishida, Department of Psychiatry and Behavioral Science,  
27 Tokyo Metropolitan Institute of Medical Science, Tokyo, Japan.

28 Address: 2-1-6 Kamikitazawa, Setagaya-ku, Tokyo 156-8506, Japan.

29 E-mail: nishida-at@igakuken.or.jp

30 Tel: +81-3-6834-2296

31 Fax: +81-3-5316-3150

## 33 **WORD COUNT**

34 Abstract: 292 words

35 Main text: 2408 words (excluding title page, abstract, references, figures and tables, funding,  
36 contributors, competing interests, ethical approval, data sharing statements, and strengths and  
37 limitations of this study)

1  
2  
3 38 **ABSTRACT**  
4

5 39 **Objectives** The rising prevalence of tobacco use and tobacco-attributable deaths among women is of  
6  
7  
8 40 worldwide concern. In particular, smoking prevention for mothers in early midlife is a significant  
9  
10  
11 41 international public health goal. A higher sense of purpose in life is thought to reduce detrimental  
12  
13  
14 42 health behaviours. However, little is known about the association between a sense of purpose in life  
15  
16  
17 43 (PIL) and tobacco use. This study investigates this association among community-dwelling mothers  
18  
19  
20 44 of early adolescents.

21  
22 45 **Design** This population-based cross-sectional study uses a self-reported questionnaire from the  
23  
24  
25 46 Tokyo Early Adolescence Survey (T-EAS), a large community-based survey conducted in Japan  
26  
27  
28 47 between 2012 and 2014.

29  
30  
31 48 **Setting** Participants were randomly recruited from the resident registries of three municipalities in  
32  
33  
34 49 Tokyo, Japan.

35  
36  
37 50 **Participants** A total of 4,478 children and their primary parents participated. Responses from 4,063  
38  
39  
40 51 mothers with no missing data were analysed (M age = 42.0 years [SD=4.2]).

41  
42 52 **Measures** Participants' tobacco use, including the number of cigarettes smoked per day, was  
43  
44  
45 53 documented using a questionnaire. PIL was assessed using a Purpose in Life scale derived from  
46  
47  
48 54 Ryff's Psychological Well-Being Scale.

49  
50  
51 55 **Results** Greater PIL was associated with a decreased likelihood of tobacco use, even when adjusted  
52  
53  
54 56 for confounders (OR = 0.80, 95%CI 0.70 to 0.91). Multinomial logistic regression analyses revealed

1  
2  
3 57 that PIL was inversely associated with tobacco consumption among mothers. These associations  
4  
5 58 remained after controlling for psychological distress, socioeconomic factors, and frequency of  
6  
7  
8 59 alcohol consumption among moderate to heavy smokers (OR = 0.70, 95%CI 0.57 to 0.86), while  
9  
10  
11 60 attenuated among light smokers.

12  
13  
14 61 **Conclusions** Increasing PIL may be a valuable intervention for reducing tobacco use among women  
15  
16  
17 62 in early midlife. This study can contribute to our understanding of the psychology of smoking  
18  
19  
20 63 behaviour, and shed light on the targeted intervention to reduce tobacco use among early midlife  
21  
22  
23 64 mothers.

#### 24 25 26 27 28 66 **KEYWORDS**

29  
30  
31 67 Purpose in life, Mother, Psychological distress, Tokyo Early Adolescence Survey (T-EAS), Tobacco  
32  
33  
34 68 use

#### 35 36 37 38 39 70 **STRENGTHS AND LIMITATIONS OF THIS STUDY**

- 40  
41  
42 71 • The study investigated the association between a sense of purpose in life (PIL) and tobacco use  
43  
44  
45 72 among community dwelling mothers in early midlife.
- 46  
47  
48 73 • Data were collected from a large community-based sample of mothers in early-middle age,  
49  
50  
51 74 randomly recruited from the resident registries of three municipalities in Tokyo.
- 52  
53  
54 75 • We demonstrated the association between PIL and tobacco use while controlling for confounders,  
55  
56  
57

1  
2  
3 76 including demographic variables and psychological distress.  
4

5 77 ▪ The study adopted a cross sectional design and was limited to determining a causal relationship  
6  
7

8 78 between PIL and tobacco use.  
9  
10  
11  
12  
13  
14  
15  
16  
17  
18  
19  
20  
21  
22  
23  
24  
25  
26  
27  
28  
29  
30  
31  
32  
33  
34  
35  
36  
37  
38  
39  
40  
41  
42  
43  
44  
45  
46  
47  
48  
49  
50  
51  
52  
53  
54  
55  
56  
57  
58  
59  
60

For peer review only



## 79 INTRODUCTION

80  
81 The tobacco epidemic is one of the most significant international public health threats.  
82 Globally, more than one in ten adult deaths is estimated to be due to tobacco. The World Health  
83 Organization is particularly concerned about the possibility that the global increase in deaths due to  
84 tobacco is driven by the accelerating rate of tobacco use in women.<sup>1</sup> Smoking prevalence among  
85 women is not decreasing, while that among men has been decreasing rapidly during the past three  
86 decades in Japan.<sup>2</sup> Tobacco use among women is dramatically increasing among those between 30  
87 and 50 years old,<sup>3</sup> and tobacco cessation in early midlife is associated with a substantial decline in  
88 mortality risk for women.<sup>4,5</sup> In addition, maternal smoking is the major determinant of child's passive  
89 smoking<sup>6</sup> and smoking initiation.<sup>7</sup> Smoking prevention for women, especially mothers, in early  
90 midlife, is therefore a significant international public health goal.

91 We examined the association between purpose in life (PIL) and tobacco use in women in  
92 early midlife. PIL is a component of psychological eudaemonic well-being, and refers to the extent to  
93 which individuals regard their own life as meaningful.<sup>8</sup> Previous studies, which have mainly  
94 examined elderly populations, have shown that a higher sense of PIL is associated with reduced risk  
95 for diseases (e.g. Alzheimer's disease,<sup>9</sup> myocardial infarction,<sup>10</sup> stroke,<sup>11</sup> cerebral infarctions<sup>12</sup>) and  
96 with better physical function<sup>13</sup> and lower mortality.<sup>14-19</sup> A growing body of research indicates the  
97 existence of links between PIL and health behaviours<sup>20</sup> (e.g. use of preventive health care services,<sup>21</sup>

1  
2  
3 98 daily exercise,<sup>22-24</sup> maintenance of a healthy diet,<sup>25 26</sup> preventive behaviours for breast cancer.<sup>23</sup>). In  
4  
5  
6 99 contrast, lower PIL is associated with detrimental health behaviours. Previous research in this area  
7  
8 100 has mainly concentrated on the association between PIL and addiction.<sup>27-30</sup>  
9

10  
11 Previous studies suggested that interventions and promotions focusing on psychological  
12  
13  
14 102 factors were important for smoking prevention and cessation among women. Meta-analyses have  
15  
16  
17 103 shown that women have more difficulty maintaining long-term smoking cessation than men,<sup>31</sup> and  
18  
19  
20 104 nicotine replacement therapy for smoking cessation is less effective in women than in men, in  
21  
22  
23 105 particular for supporting long-term maintenance of smoking cessation.<sup>32</sup> Another meta-analysis  
24  
25  
26 106 demonstrated that motivational interviewing, which is a psychological approach used to enhance PIL  
27  
28  
29 107 among people with addictive behaviours, could be effective for tobacco cessation.<sup>33</sup>  
30

31 108 Purpose in life might be a significant psychological factor for promoting tobacco cessation  
32  
33  
34 109 among women. However, relatively little is known about the association between PIL and tobacco  
35  
36  
37 110 use, with no study to date examining this association in women in early midlife. A previous survey  
38  
39  
40 111 on 341 adults in Hungary<sup>34</sup> demonstrated that daily smokers had lower PIL than non-smokers,  
41  
42  
43 112 although the sample was limited to a small number and did not focus on women in early midlife. In  
44  
45  
46 113 the current study, we hypothesized that PIL is inversely associated with tobacco use among early  
47  
48  
49 114 midlife mothers, even after controlling for demographic variables and the effect of psychological  
50  
51  
52 115 distress. Psychological distress (depression and/or anxiety) often co-occurs with tobacco use.<sup>35-42</sup>  
53  
54 116 Since psychological distress (ill-being) is inversely associated with PIL<sup>8 43 44</sup> and is positively  
55  
56  
57  
58  
59  
60

1  
2  
3 117 associated with substance abuse,<sup>28 29</sup> it could confound associations between PIL and tobacco use.

4  
5 118 We also hypothesized that PIL is inversely associated with the amount of tobacco consumption.

6  
7  
8 119

9  
10  
11 120 **METHODS**

12  
13  
14 121

15  
16  
17 122 **Study design, sample, and survey procedure**

18  
19  
20 123

21  
22 124 This study used data from the Tokyo Early Adolescence Survey (T-EAS),[45, 46] which was  
23  
24  
25 125 originally designed as a baseline survey for the Tokyo Teen Cohort, a currently ongoing longitudinal  
26  
27  
28 126 cohort study (URL: <http://ttcp.umin.jp/index.html>). The T-EAS is a multidisciplinary survey of  
29  
30  
31 127 10-year-old adolescents and their main carers (98.5% mothers). The T-EAS contains questions about  
32  
33  
34 128 tobacco use, PIL, and psychological distress, as well as a variety of other potentially confounding  
35  
36  
37 129 variables. Participants were randomly recruited from the resident registries of three municipalities in  
38  
39  
40 130 Tokyo: Setagaya Ward, Mitaka City, and Chofu City. Participants were sent invitation letters on or  
41  
42  
43 131 around the child's tenth birthday. The survey was completed in two home visits. During the first visit,  
44  
45  
46 132 written informed consent from the main carer (generally the mother) was obtained; participants were  
47  
48  
49 133 then asked to complete the questionnaires at home before the second visit. During the second visit,  
50  
51  
52 134 both the adolescent and the main carer were each asked to complete the self-report questionnaires  
53  
54  
55 135 separately. The questionnaires were enclosed in envelopes by the respondents immediately after

1  
2  
3 136 completion. In addition, the main carer responded to a semi-structured interview. All data were  
4  
5 137 collected anonymously. The T-EAS was conducted by three research institutes: Tokyo Metropolitan  
6  
7  
8 138 Institute of Medical Science, The University of Tokyo, and SOKENDAI (The Graduate University  
9  
10  
11 139 for Advanced Studies). This survey was approved by the ethics committees of these three institutes.  
12  
13  
14 140

## 141 **Participants**

142  
143 A total of 4,478 children and their primary parents participated in the Tokyo Early  
144 Adolescence Survey (T-EAS) (response rate 43.8%). We used the primary parent data for the  
145 purposes of the current study. Of the 4,478 respondents, 68 were men, and were hence excluded to  
146 focus the investigation on the association between PIL and tobacco use in women. An additional 347  
147 female respondents' data were excluded due to incomplete answers to the questions on tobacco use,  
148 PIL, psychological distress, or other confounding variables. The final dataset therefore contained  
149 data from 4,063 respondents.  
150

## 151 **Measures**

### 152 153 Tobacco Use

154 Respondents were asked whether they used tobacco. Those who answered 'yes' were

1  
2  
3 155 subsequently asked about the number of cigarettes they smoked per day. A binary variable was  
4  
5 156 created ('0: non-smokers' versus '1: smokers'), based on the first question. Respondents were then  
6  
7  
8 157 split into: '0: non-smokers', '1: light smokers (less than half a pack per day)', and '2: moderate to  
9  
10  
11 158 heavy smokers (more than or equal to half a pack per day)', to assess potential dose-response effects.  
12  
13

14 159

## 160 Purpose in Life

161 PIL was assessed using a 14-item version of the Purpose in Life scale derived from Ryff's  
162 Psychological Well-Being scales.<sup>8</sup> The scale included items such as 'I have a sense of direction and  
163 purpose in life', and 'My daily activities often seem trivial and unimportant to me' (reverse coded).  
164 Each item was rated on a 6-point Likert scale (1: strongly disagree; 6: strongly agree) and scores  
165 were summed, so that continuous scores ranged from 14 to 84. Higher scores indicated a higher  
166 sense of PIL.

167

## 168 Psychological Distress

169 Psychological distress was assessed using the K6.<sup>47</sup> This survey contains six items,  
170 assessing how frequently during the past 30 days respondents felt: i) so depressed that nothing could  
171 cheer them up, ii) hopeless, iii) restless or fidgety, iv) that everything was an effort, v) worthless, and  
172 vi) nervous. Each item was scored on a 5-point Likert scale (0: never; 4: most of the time). Scores  
173 were summed, with the resulting raw scores ranging from 0 to 24. Higher scores indicate more

1  
2  
3 174 frequent psychological distress during the past 30 days.  
4

5 175  
6

7  
8 176 Other covariates  
9

10  
11 177 The following covariates were examined for their potential confounding effects: age,  
12

13  
14 178 educational attainment, marital status, annual family income, and frequency of alcohol consumption.  
15

16  
17 179 High socioeconomic status (represented by educational attainment and annual family income here) is  
18

19  
20 180 known to be associated with higher PIL,<sup>42</sup> and socioeconomic disadvantage is a risk factor for  
21

22  
23 181 tobacco use.<sup>48-51</sup> Educational attainment was coded as follows: '1: junior high school or lower', '2:  
24

25  
26 182 high school', '3: technical or junior college', and '4: 4-year university or higher'. Marital status was  
27

28  
29 183 dichotomized as '1: yes' or '0: no', depending on whether the respondent was in a marriage or  
30

31  
32 184 marriage-like relationship. Family income over the past year was divided into four categories: '1:  
33

34  
35 185 less than 4 million yen', '2: 4–6 million yen', '3: 7–9 million yen', and '4: over 10 million yen'.  
36

37  
38 186 Frequency of alcohol consumption was assessed using a 5-point Likert scale (0: do not drink; 4:  
39

40  
41 187 more than 4 times a week).  
42

43 188  
44

45  
46 189 Statistical analyses  
47

48  
49 190 Cross tabulation and chi-square tests were conducted to test the differences between three  
50

51  
52 191 groups based on the amounts of tobacco used (none, light, and moderate to heavy smokers), and  
53

54  
55 192 covariates in categorical variables as well as ANOVAs were used in continuous variables. We  
56

1  
2  
3 193 conducted binomial logistic regression analyses (using a binary dependent variable: non-smokers vs.  
4  
5 194 smokers) to test the association between PIL and tobacco use. The PIL score was standardized to  
6  
7  
8 195 report odds ratios per one standard deviation change of PIL scores. Logistic regression model 1 was  
9  
10  
11 196 unadjusted for covariates; model 2 was adjusted for socioeconomic covariates: age, education,  
12  
13  
14 197 marital status, and family income; model 3 was further adjusted for alcohol consumption; and finally,  
15  
16  
17 198 model 4 was further adjusted for psychological distress (see Table 2). In order to further examine the  
18  
19  
20 199 relationship between PIL and tobacco use, we conducted multinomial logistic regression analyses to  
21  
22  
23 200 assess the effect of PIL on the degree of tobacco use. Regression models 5 to 8 were identical to  
24  
25  
26 201 models 1 to 4, except that the dependent variable was multivariate: non-smokers, light smokers, and  
27  
28 202 moderate or heavy smokers.  
29  
30  
31 203  
32  
33

## 34 204 **RESULTS**

### 35 36 37 205 38 39 206 **Prevalence of smokers and corresponding descriptive statistics**

40  
41  
42 207  
43  
44  
45 208 Of the 4,063 respondents (mean age 42.0 years, standard deviation 4.2; 95.8% married;  
46  
47  
48 209 40.1% achieved a degree from a 4-year university or higher; 8.8% had family income less than 4  
49  
50  
51 210 million yen), 324 (8.0%) were smokers. 204 (5.0%) were light smokers, 120 (3.0%) were moderate  
52  
53  
54 211 to heavy smokers. Chi-square tests and ANOVA indicated that inverse associations were clearly  
55  
56  
57  
58  
59  
60

1  
2  
3 212 evident between tobacco use and PIL, age, education, marital status, and annual family income  
4  
5 213 (Table 1). Psychological distress was higher in smokers than in non-smokers (Table 1). On the other  
6  
7  
8 214 hand, the highest alcohol consumption was reported by light smokers (Table 1).  
9

10  
11 21512  
13  
14 216

*[Insert Table 1 about here]*

15  
16  
17 217

### 18 19 20 218 **The association between PIL and tobacco use**

21  
22 219

23  
24  
25 220 Table 2 shows the binominal odds ratios for tobacco use compared to no smoking. PIL was  
26  
27  
28 221 strongly inversely associated with tobacco use in the analysis without covariates (Model 1). The odds  
29  
30  
31 222 ratio was not attenuated after adjusting for socioeconomic variables (Model 2). This was also the  
32  
33  
34 223 case after adjusting for alcohol consumption (Model 3) and finally, for psychological distress (Model  
35  
36  
37 224 4). With regard to the covariates in the fully adjusted model, educational attainment, marital status,  
38  
39  
40 225 and family annual income were inversely associated with tobacco use. There was a positive  
41  
42  
43 226 association between tobacco use and frequency of alcohol consumption. Psychological distress was  
44  
45  
46 227 not associated with tobacco use.

47  
48 22849  
50  
51 229

*[Insert Table 2 about here]*



1  
2  
3 230 **The association between PIL and amount of tobacco consumption**  
4

5 231

6  
7  
8 232 Figure 1 shows the odds ratios for smoking consumption, produced by multinomial logistic

9  
10  
11 233 regressions comparing light and moderate to heavy smoking against the no smoking reference

12  
13  
14 234 category. Without any adjustment (Model 5), PIL was inversely associated with both light and

15  
16  
17 235 moderate to heavy smoking (light smoking: OR = 0.77, 95%CI: 0.67-0.89,  $p < .001$ ; moderate to

18  
19  
20 236 heavy smoking: OR = 0.62, 95%CI: 0.52-0.74,  $p < .001$ ). The odds ratios remained significant after

21  
22  
23 237 adjusting for socioeconomic covariates (Model 6: light smoking: OR = 0.86, 95%CI: 0.74-1.00,  $p =$

24  
25  
26 238 0.046; moderate to heavy smoking: OR = 0.72, 95%CI: 0.59-0.87,  $p < .001$ ) and further adjustment

27  
28  
29 239 for alcohol consumption (Model 7: light smoking: OR = 0.86, 95%CI: 0.74-0.99,  $p = 0.041$ ;

30  
31  
32 240 moderate to heavy smoking: OR = 0.71, 95%CI: 0.59-0.87,  $p < .001$ ). Adjusting further for

33  
34  
35 241 psychological distress (Model 8), the association between PIL and light smoking was not significant

36  
37  
38 242 (OR = 0.87, 95%CI: 0.74-1.02,  $p = 0.079$ ). On the other hand, the odds ratio for moderate to heavy

39  
40  
41 243 smoking was not attenuated after adjustment for any of the aforementioned variables (OR = 0.70,

42  
43  
44 244 95%CI: 0.57-0.86,  $p < .001$ ; See Figure 1).

45 245

46  
47  
48 246

*[Insert Figure 1 about here]*

49  
50  
51 247

52  
53  
54 248

1  
2  
3 249 **DISCUSSION**  
4

5 250  
6  
7

8 251 In a community-based sample of mothers in early-middle age, we found that PIL was  
9  
10  
11 252 inversely associated with tobacco use after controlling for age, education, marital status, family  
12  
13  
14 253 income, and alcohol use. Importantly, this was also the case even after taking psychological distress  
15  
16  
17 254 into account. PIL was also inversely associated with the risk of moderate to heavy tobacco  
18  
19  
20 255 consumption even after controlling for covariates. This result is consistent with that of a previous  
21  
22  
23 256 study on a community sample in Hungary.<sup>34</sup> We confirmed the association between PIL and tobacco  
24  
25  
26 257 use with a large population-based sample of women in early midlife in Japan.  
27

28 258 It is possible that individuals with higher PIL are likely to invest in healthy behaviours  
29  
30  
31 259 because they feel that their lives are meaningful, have a greater will to live and, therefore, are more  
32  
33  
34 260 proactive in taking care of their health<sup>21</sup> (e.g., by the avoidance of smoking). They may also be  
35  
36  
37 261 motivated to acquire knowledge regarding health maintenance (i.e., the knowledge about how  
38  
39  
40 262 detrimental smoking is). In contrast, since those low in PIL lack a high sense of life's  
41  
42  
43 263 meaningfulness, it may seem pointless for them to protect their health, and they may prefer  
44  
45  
46 264 short-term gratification, such as that obtained through tobacco use.  
47

48 265 The association between PIL and tobacco use was robust even when controlling for  
49  
50  
51 266 psychological distress. It may suggest a relationship between a lack of eudaemonic well-being (PIL)  
52  
53  
54 267 and tobacco use, rather than a relationship between ill-being (psychological distress) and tobacco  
55  
56  
57

1  
2  
3 268 use. Mental well-being and mental illness are correlated but belong to separate continua, with  
4  
5 269 well-being referring to the presence of positive feelings and positive functioning, rather than just the  
6  
7  
8 270 absence of mental illness.<sup>52 53</sup>  
9

10  
11 271 The present results suggest that increasing PIL may be a valuable target of intervention for  
12  
13  
14 272 reducing tobacco use, as well as for reducing substance abuse.<sup>29</sup> PIL is modifiable<sup>54 55</sup> and increasing  
15  
16  
17 273 awareness of one's values or long-term goals in life could increase the sense of PIL.<sup>56 57</sup> Promotion  
18  
19  
20 274 focusing on increasing PIL might be effective in reducing tobacco use in public settings.  
21

22 275 This study is limited of course, in its capacity to determine causality, since the data were  
23  
24  
25 276 cross-sectional. Longitudinal studies should be conducted in order to determine whether PIL has a  
26  
27  
28 277 role in tobacco use. We are currently conducting a subsequent longitudinal cohort study (Tokyo Teen  
29  
30  
31 278 Cohort Study), which will further clarify causality between PIL and tobacco use among mothers. The  
32  
33  
34 279 sample was limited only to mothers and we could not examine the association among early-middle  
35  
36  
37 280 aged women without children. Further studies including them would be needed. Additionally, given  
38  
39  
40 281 that parental smoking, especially maternal smoking, is the major determinant of passive smoking<sup>6</sup>  
41  
42  
43 282 and smoking initiation<sup>7</sup> in children, follow-up studies should examine the transgenerational effects of  
44  
45  
46 283 mothers' tobacco use on the initiation of smoking in their children.  
47

48 284 In summary, in a large community-based study, we found that high PIL is associated with  
49  
50  
51 285 lower consumption of tobacco among mothers, after controlling for a range of potential confounds,  
52  
53  
54 286 including psychological distress. Our hypothesis, that PIL is independently and inversely associated  
55  
56  
57  
58  
59  
60

1  
2  
3 287 with tobacco use, was therefore confirmed. This study may contribute to our understanding of the  
4  
5 288 psychology of smoking behaviour and shed light on the target for intervention to reduce tobacco use  
6  
7  
8 289 among early midlife mothers.  
9

10  
11 290

### 14 291 **Contributors**

15  
16 292 YM, SY, SA, SKoike, AN, MHH and KK involved in launching and maintaining the survey.  
17  
18  
19 293 SF, SKanata and KE have mainly contributed to data collection. MN, SLH and MR mainly  
20  
21  
22 294 contributed to design the study and proposing the analysis and interpretation of data. YM and SY  
23  
24  
25 295 wrote the first draft of the manuscript and all the other authors have critically reviewed it. All authors  
26  
27  
28 296 approved the final version of the manuscript.  
29

30  
31 297

### 34 298 **Funding**

35  
36 299 This study was supported by a Japan Scientific Research Grant on an Innovative Area from the  
37  
38  
39 300 Ministry of Education, Culture, Sports, Science and Technology (MEXT KAKENHI 23118002); a  
40  
41  
42 301 Japan Scientific Research Grant on an Innovative Area from the Japan Society for the Promotion of  
43  
44  
45 302 Science (JSPS KAKENHI 16H06395, 16H06398, 16K21720); a Grant-in-Aid for Challenging  
46  
47  
48 303 Exploratory Research from the Japan Society for the Promotion of Science (JSPS KAKENHI  
49  
50  
51 304 16K13499); a Grant-in-Aid for Scientific Research (B) from the Japan Society for the Promotion of  
52  
53  
54 305 Science (JSPS KAKENHI 16H03745); and a Tokyo Metropolitan Institute of Medical Science  
55  
56

1  
2 306 Project Grant (Kokoronokenko H27-H31). However, these funding sources had no involvement in  
3  
4  
5 307 the study design; in the collection, analysis and interpretation of data; in the writing of the articles; or  
6  
7  
8 308 in the decision to submit it for publication.  
9

10  
11 309

12  
13  
14 310 **Competing interests**

15  
16 311 None.  
17  
18  
19  
20 312

21  
22 313 **Ethics approval**

23  
24  
25 314 This study was conducted by three research institutes: Tokyo Metropolitan Institute of Medical  
26  
27  
28 315 Science, The University of Tokyo, and SOKENDAI (The Graduate University for Advanced  
29  
30  
31 316 Studies). This study was approved by the ethics committees of these three institutes.  
32  
33

34 317

35  
36 318 **Data sharing statement**

37  
38  
39 319 This study was planned and conducted in accordance with the ethics committee of Tokyo  
40  
41  
42 320 Metropolitan Institute of Medical Science. When applying to the research ethics committee for the  
43  
44  
45 321 data set, the authors did not request this to be released as public data. However, the data can be made  
46  
47  
48 322 available to all interested researchers upon request to Dr. Atsushi Nishida, Ph.D.  
49  
50  
51 323 (nishida-at@igakuken.or.jp).  
52

53 324  
54  
55  
56  
57  
58  
59  
60

1  
2 325 **REFERENCES**

- 3  
4 326 1 World Health Organization. WHO global report on mortality attributable to tobacco. Geneva:  
5  
6  
7 327 World Health Organization 2012.
- 8  
9  
10 328 2 Funatogawa I, Funatogawa T, Yano E. Trends in smoking and lung cancer mortality in Japan, by  
11  
12 329 birth cohort, 1949–2010. *Bull World Health Organ* 2013;91:332–40.  
13  
14  
15 330 doi:10.2471/BLT.12.108092.
- 16  
17  
18 331 3 Lopez AD, Collishaw NE, Piha T. A descriptive model of the cigarette epidemic in developed  
19  
20  
21 332 countries. *Tob Control* 1994;3:242–7. doi:10.1136/tc.3.3.242.
- 22  
23  
24 333 4 Gram IT, Sandin S, Braaten T, et al. The hazards of death by smoking in middle-aged women. *Eur*  
25  
26  
27 334 *J Epidemiol* 2013;28:799–806. doi:10.1007/s10654-013-9851-6.
- 28  
29  
30 335 5 Pirie K, Peto R, Reeves GK, et al. The 21st century hazards of smoking and benefits of stopping: a  
31  
32 336 prospective study of one million women in the UK. *Lancet* 2013;381:133–41.  
33  
34  
35 337 doi:10.1016/S0140-6736(12)61720-6.
- 36  
37  
38 338 6 Stiby AI, Macleod J, Hickman M, et al. Association of maternal smoking with child cotinine levels.  
39  
40  
41 339 *Nicotine Tob Res* 2013;15:2029–36. doi:10.1093/ntr/ntt094.
- 42  
43  
44 340 7 Voorhees CC, Ye C, Carter-Pokras O, et al. Peers, tobacco advertising, and secondhand smoke  
45  
46  
47 341 exposure influences smoking initiation in diverse adolescents. *Am J Health Promot* 2011;25:  
48  
49  
50 342 e1–11. doi:10.4278/ajhp.090604-QUAN-180.
- 51  
52  
53 343 8 Ryff CD. Happiness is everything, or is it? Explorations on the meaning of psychological  
54  
55 344 well-being. *J Pers Soc Psychol* 1989;57:1069–81. doi:10.1037/0022-3514.57.6.1069.

- 1  
2  
3 345 9 Boyle PA, Buchman AS, Barnes LL, et al. Effect of a purpose in life on risk of incident Alzheimer  
4  
5 346 disease and mild cognitive impairment in community-dwelling older persons. *Arch Gen*  
6  
7  
8 347 *Psychiatry* 2010;67:304–10. doi:10.1001/archgenpsychiatry.2009.208.  
9  
10  
11 348 10 Kim ES, Sun JK, Park N, et al. Purpose in life and reduced risk of myocardial infarction among  
12  
13  
14 349 older US adults with coronary heart disease: a two-year follow-up. *J Behav Med*  
15  
16 350 2013a;36:124–33. doi:10.1007/s10865-012-9406-4.  
17  
18  
19 351 11 Kim ES, Sun JK, Park N, et al. Purpose in life and reduced incidence of stroke in older adults:  
20  
21  
22 352 ‘The Health and Retirement Study’. *J Psychosom Res* 2013b;74:427–32.  
23  
24  
25 353 doi:10.1016/j.jpsychores.2013.01.013.  
26  
27  
28 354 12 Yu L, Boyle PA, Wilson RS, et al. Purpose in life and cerebral infarcts in community-dwelling  
29  
30  
31 355 older people. *Stroke* 2015;46:1071–6. doi:10.1161/STROKEAHA.114.008010.  
32  
33  
34 356 13 Kim ES, Kawachi I, Chen Y, et al. Association between purpose in life and objective measures of  
35  
36  
37 357 physical function in older adults. *JAMA Psychiatry* 2017;1039–45.  
38  
39  
40 358 doi:10.1001/jamapsychiatry.2017.2145.  
41  
42  
43 359 14 Boyle PA, Barnes LL, Buchman AS, et al. Purpose in life is associated with mortality among  
44  
45  
46 360 community-dwelling older persons. *Psychosom Med* 2009;71:574–9.  
47  
48 361 doi:10.1097/PSY.0b013e3181a5a7c0.  
49  
50  
51 362 15 Cohen R, Bavishi C, Rozanski A. Purpose in life and its relationship to all-cause mortality and  
52  
53  
54 363 cardiovascular events: a meta-analysis. *Psychosom Med* 2016;78:122–33.  
55  
56  
57  
58  
59  
60

1  
2  
3 364 doi:10.1097/PSY.0000000000000274.  
4

5 365 16 Hill PL, Turiano NA. Purpose in life as a predictor of mortality across adulthood. *Psychol Sci*  
6  
7  
8 366 2014;25:1482–6. doi:10.1177/0956797614531799.  
9

10  
11 367 17 Koizumi M, Ito H, Kaneko Y, et al. Effect of having a sense of purpose in life on the risk of death  
12  
13  
14 368 from cardiovascular diseases. *J Epidemiol* 2008;18:191–6. doi:10.2188/jea.JE2007388.  
15

16  
17 369 18 Krause, N. Meaning in life and mortality. *J Gerontol B Psychol Sci Soc Sci* 2009;64:517–27.  
18  
19  
20 370 doi:10.1093/geronb/gbp047.  
21

22  
23 371 19 Sone T, Nakaya N, Ohmori K, et al. Sense of life worth living (ikigai) and mortality in Japan:  
24  
25 372 Ohsaki Study. *Psychosom Med* 2008;70:709–15. doi:10.1097/PSY.0b013e31817e7e64.  
26  
27

28 373 20 Roepke AM, Jayawickreme E, Riffle OM. Meaning and health: a systematic review. *Appl Res*  
29  
30  
31 374 *Qual Life* 2014;9:1055–79. doi:10.1007/s11482-013-9288-9.  
32

33  
34 375 21 Kim ES, Strecher VJ, Ryff CD. Purpose in life and use of preventive health care services. *Proc*  
35  
36  
37 376 *Natl Acad Sci U.S.A.* 2014;111:16331–6. doi:10.1073/pnas.1414826111.  
38

39  
40 377 22 Holahan CK, Holahan CJ, Suzuki R. Purposiveness, physical activity, and perceived health in  
41  
42  
43 378 cardiac patients. *Disabil Rehabil* 2008;30:1772–8. doi:10.1080/10428190701661508.  
44

45 379 23 Holahan CK, Suzuki R. Motivational factors in health promoting behavior in later aging. *Act*  
46  
47  
48 380 *Adapt Aging* 2006;30:47–60. doi:10.1300/J016v30n01\_03.  
49

50  
51 381 24 Hooker SA, Masters KS. Purpose in life is associated with physical activity measured by  
52  
53  
54 382 accelerometer. *J Health Psychol* 2014;21:962–71. doi:10.1177/1359105314542822.  
55  
56



- 1  
2  
3 383 25 Conner TS, Brookie KL, Richardson AC, et al. On carrots and curiosity: eating fruit and  
4  
5 384 vegetables is associated with greater flourishing in daily life. *Br J Health Psychol*  
6  
7  
8 385 2015;20:413–27. doi:10.1111/bjhp.12113.  
9  
10  
11 386 26 Piko BF, Brassai L. The role of individual and familial protective factors in adolescents' diet  
12  
13  
14 387 control. *J Health Psychol* 2009;14:810–9. doi:10.1177/1359105309338971.  
15  
16  
17 388 27 Carroll S. Spirituality and purpose in life in alcoholism recovery. *J Stud Alcohol* 1993;54:297–  
18  
19  
20 389 301. doi:10.15288/jsa.1993.54.297.  
21  
22  
23 390 28 Harlow LL, Newcomb MD, Bentler PM. Depression, self-derogation, substance use, and suicide  
24  
25 391 ideation: lack of purpose in life as a mediational factor. *J Clin Psychol* 1986;42:5–21.  
26  
27  
28 392 doi:10.1002/1097-4679(198601)42:13.0.CO;2-9.  
29  
30  
31 393 29 Martin RA, MacKinnon S, Johnson J, et al. Purpose in life predicts treatment outcome among  
32  
33  
34 394 adult cocaine abusers in treatment. *J Subst Abuse Treat* 2011;40:183–8.  
35  
36  
37 395 doi:10.1016/j.jsat.2010.10.002.  
38  
39  
40 396 30 Robinson EA, Cranford JA, Webb JR, et al. Six-month changes in spirituality, religiousness, and  
41  
42  
43 397 heavy drinking in a treatment-seeking sample. *J Stud Alcohol Drugs* 2007;68:282–90.  
44  
45  
46 398 doi:10.15288/jsad.2007.68.282.  
47  
48  
49 399 31 Smith PH, Bessette AJ, Weinberger AH, et al. Sex/gender differences in smoking cessation: a  
50  
51  
52 400 review. *Prev Med* 2016;92:135-40. doi:10.1016/j.ypped.2016.07.013.  
53  
54  
55 401 32 Cepeda-Benito A, Reynoso JT, Erath S. Meta-analysis of the efficacy of nicotine replacement  
56  
57  
58  
59  
60

- 1  
2  
3 402 therapy for smoking cessation: differences between men and women. *J Consult Clin Psychol*  
4  
5 403 2004;72:712–22. doi:10.1037/0022-006X.72.4.712.  
6  
7  
8 404 33 Heckman CJ, Egleston BL, Hofmann MT. Efficacy of motivational interviewing for smoking  
9  
10  
11 405 cessation: a systematic review and meta-analysis. *Tob Control* 2010;19:410-6. doi:  
12  
13 406 10.1136/tc.2009.033175.  
14  
15  
16 407 34 Konkolý Thege B, Bachner YG, Martos T, et al. Meaning in life: does it play a role in smoking?  
17  
18  
19 408 *Subst Use Misuse* 2009;44:1566–77. doi:10.1080/10826080802495096.  
20  
21  
22 409 35 Anda RF, Williamson DF, Escobedo LG, et al. Depression and the dynamics of smoking: a  
23  
24  
25 410 national perspective. *JAMA* 1990;264:1541–5. doi:10.1001/jama.1990.03450120053028.  
26  
27  
28 411 36 Boden, JM, Fergusson DM, Horwood LJ. Cigarette smoking and depression: tests of causal  
29  
30  
31 412 linkages using a longitudinal birth cohort. *Br J Psychiatry* 2010;196:440–6.  
32  
33  
34 413 doi:10.1192/bjp.bp.109.065912.  
35  
36  
37 414 37 Breslau N, Peterson EL, Schultz LR, et al. Major depression and stages of smoking: a longitudinal  
38  
39  
40 415 investigation. *Arch Gen Psychiatry* 1998;55:161–6. doi:10.1097/PSY.0b013e3181a5a7c0.  
41  
42  
43 416 38 Glassman AH, Helzer JE, Covey LS, et al. Smoking, smoking cessation, and major depression.  
44  
45 417 *JAMA* 1990;264:1546–9. doi:10.1001/jama.1990.03450120058029.  
46  
47  
48 418 39 Kendler KS, Neale MC, MacLean CJ, et al. Smoking and major depression: a causal analysis.  
49  
50  
51 419 *Arch Gen Psychiatry* 1993;50:36–43. doi:10.1001/archpsyc.1993.01820130038007.  
52  
53  
54 420 40 Lawrence D, Mitrou F, Zubrick SR. Smoking and mental illness: results from population surveys  
55  
56  
57  
58  
59  
60

- 1  
2  
3 421 in Australia and the United States. *BMC Public Health* 2009;9:285.  
4  
5 422 doi:10.1186/1471-2458-9-285.  
6  
7  
8 423 41 Leung J, Gartner C, Hall W, et al. A longitudinal study of the bi-directional relationship between  
9  
10  
11 424 tobacco smoking and psychological distress in a community sample of young Australian  
12  
13  
14 425 women. *Psychol Med* 2012;42:1273–82. doi:10.1017/S0033291711002261.  
15  
16  
17 426 42 Moylan S, Jacka FN, Pasco JA. Cigarette smoking, nicotine dependence and anxiety disorders: a  
18  
19  
20 427 systematic review of population-based, epidemiological studies. *BMC Med* 2012;10:123.  
21  
22  
23 428 doi:10.1186/1741-7015-10-123.  
24  
25  
26 429 43 Pinguart M. Creating and maintaining purpose in life in old age: a meta-analysis. *Ageing Int*  
27  
28  
29 430 2002;27:90–114. doi:10.1007/s12126-002-1004-2.  
30  
31  
32 431 44 Zika S, Chamberlain K. On the relation between meaning in life and psychological well-being. *Br*  
33  
34  
35 432 *J Psychol* 1992;83:133–45. doi:10.1111/j.2044-8295.1992.tb02429.x.  
36  
37  
38 433 45 Kanata S, Koike S, Ando S, et al. Enuresis and hyperactivity-inattention in early adolescence:  
39  
40  
41 434 Findings from a population-based survey in Tokyo (Tokyo Early Adolescence Survey). *PloS*  
42  
43  
44 435 *One* 2016;11:e0158786. doi:10.1371/journal.pone.0158786.  
45  
46  
47 436 46 Yamasaki S, Ando S, Koike S, et al. Dissociation mediates the relationship between peer  
48  
49  
50 437 victimization and hallucinatory experiences among early adolescents. *Schizophr Res Cogn*  
51  
52  
53 438 2016;4:18–23. doi:10.1016/j.scog.2016.04.001.  
54  
55  
56 439 47 Kessler RC, Andrews G, Colpe LJ, et al. Short screening scales to monitor population prevalences  
57  
58  
59  
60

- 1  
2  
3 440 and trends in non-specific psychological distress. *Psychol Med*; 2002;32, 959–76.  
4  
5 441 doi:10.1017/S0033291702006074.  
6  
7  
8 442 48 Amos A. Women and smoking. *Br Med Bull* 1996;52:74–89.  
9  
10  
11 443 49 David A, Esson K, Perucic AM, et al. Tobacco use: equity and social determinants. In: Blas E,  
12  
13 444 Kurup AS, eds. *Equity, Social Determinants and Public Health Programmes*. Geneva: World  
14  
15 445 Health Organization 2010  
16  
17 446 50 Hiscock R, Bauld L, Amos A, et al. Socioeconomic status and smoking: a review. *Ann N Y Acad*  
18  
19 447 *Sci* 2012;1248:107–23. doi:10.1111/j.1749-6632.2011.06202.x.  
20  
21  
22 448 51 Laaksonen M, Rahkonen O, Karvonen S, et al. Socioeconomic status and smoking. *Eur J Public*  
23  
24 449 *Health* 2005;15:262–9. doi:10.1093/eurpub/cki115.  
25  
26  
27 450 52 Keyes CL. The mental health continuum: from languishing to flourishing in life. *J Health Soc*  
28  
29 451 *Behav* 2002;43:207–22. doi:10.2307/3090197.  
30  
31  
32 452 53 Keyes, CL. Mental illness and/or mental health? Investigating axioms of the complete state model  
33  
34 453 of health. *J Consult Clin Psychol* 2005;73:539–48. doi:10.1037/0022-006X.73.3.539.  
35  
36  
37 454 54 Ryff CD. Psychological well-being revisited: advances in the science and practice of eudaimonia.  
38  
39 455 *Psychother Psychosom* 2014;83:10–28. doi:10.1159/000353263.  
40  
41  
42 456 55 Ryff CD. The benefits of purposeful life engagement on later-life physical function. *JAMA*  
43  
44 457 *Psychiatry* 2017;74:1046–7. doi:10.1001/jamapsychiatry.2017.2136.  
45  
46  
47 458 56 Dolan SL, Rohsenow DJ, Martin RA, et al. Urge-specific and lifestyle coping strategies of  
48  
49  
50  
51  
52  
53  
54  
55  
56  
57  
58  
59  
60

1  
2  
3  
4  
5  
6  
7  
8  
9  
10  
11  
12  
13  
14  
15  
16  
17  
18  
19  
20  
21  
22  
23  
24  
25  
26  
27  
28  
29  
30  
31  
32  
33  
34  
35  
36  
37  
38  
39  
40  
41  
42  
43  
44  
45  
46  
47  
48  
49  
50  
51  
52  
53  
54  
55  
56  
57  
58  
59  
60

459 alcoholics: relationships of specific strategies to treatment outcome. *Drug Alcohol Depend*

460 2013;128:8–14. doi:10.1016/j.drugalcdep.2012.07.010.

461 57 Miller WR, Rollnick S. *Motivational Interviewing: Helping People Change*, third ed. New York:

462 Guilford Press 2012

463

For peer review only

**Table 1. Descriptive statistics for T-EAS variables broken down by tobacco use**

|                                                 | Non-smokers | Light smokers | Moderate to heavy smokers | <i>p</i> |
|-------------------------------------------------|-------------|---------------|---------------------------|----------|
| N (%)                                           | 3739 (92.0) | 204 (5.0)     | 120 (3.0)                 |          |
| Purpose in Life, mean (standard deviation [SD]) | 57.3 (9.7)  | 54.8 (9.8)    | 52.6 (9.9)                | <.001    |
| Age, mean (SD)                                  | 42.0 (4.1)  | 41.2 (5.0)    | 40.5 (4.8)                | <.001    |
| Education, n (%)                                |             |               |                           |          |
| Junior high school or lower                     | 22 (0.6)    | 12 (5.9)      | 9 (7.5)                   | <.001    |
| High school                                     | 512 (13.7)  | 66 (32.4)     | 48 (40.0)                 |          |
| Technical or junior college                     | 1626 (43.5) | 89 (43.6)     | 51 (42.5)                 |          |
| 4-year university or higher                     | 1579 (42.2) | 37 (18.1)     | 12 (10.0)                 |          |
| Marital status, n (%)                           |             |               |                           |          |
| Yes                                             | 3613 (96.6) | 182 (89.2)    | 97 (80.8)                 | <.001    |
| No                                              | 126 (3.4)   | 22 (10.8)     | 23 (19.2)                 |          |
| Family annual income, n (%)                     |             |               |                           |          |
| Less than 4 million yen                         | 285 (7.6)   | 42 (20.6)     | 31 (25.8)                 | <.001    |
| 4–6 million yen                                 | 1022 (27.3) | 74 (36.3)     | 57 (47.5)                 |          |
| 7–9 million yen                                 | 1162 (31.1) | 55 (27.0)     | 21 (17.5)                 |          |
| More than 10 million yen                        | 1270 (34.0) | 33 (16.2)     | 11 (9.2)                  |          |
| Alcohol use, n (%)                              |             |               |                           |          |
| Non                                             | 1160 (31.0) | 44 (21.6)     | 43 (35.8)                 | <.001    |
| Less than once a month                          | 563 (15.1)  | 35 (17.2)     | 9 (7.5)                   |          |
| 2–4 times a month                               | 689 (18.4)  | 24 (11.8)     | 15 (12.5)                 |          |
| 2–3 times a week                                | 594 (15.9)  | 21 (10.3)     | 16 (13.3)                 |          |
| More than 4 times a week                        | 733 (19.6)  | 80 (39.2)     | 37 (30.8)                 |          |
| K6 (Psychological Distress), mean (SD)          | 2.9 (3.3)   | 3.4 (3.4)     | 3.5 (3.9)                 | .026     |

**Table 2. Logistic regression coefficients for odds of tobacco use, with and without potential confounding variables**

|                        | Model 1          |          | Model 2          |          | Model 3          |          | Model 4          |          |
|------------------------|------------------|----------|------------------|----------|------------------|----------|------------------|----------|
|                        | OR [95% CI]      | <i>p</i> |
| Purpose in Life        | 0.71 [0.63-0.80] | <.001    | 0.81 [0.71-0.91] | .001     | 0.80 [0.71-0.91] | <.001    | 0.80 [0.70-0.91] | .001     |
| Age                    |                  |          | 0.98 [0.95-1.00] | .061     | 0.97 [0.95-1.00] | .043     | 0.97 [0.95-1.00] | .044     |
| Education              |                  |          | 0.44 [0.38-0.52] | <.001    | 0.45 [0.38-0.52] | <.001    | 0.45 [0.38-0.52] | <.001    |
| Marital Status         |                  |          | 0.41 [0.27-0.62] | <.001    | 0.41 [0.27-0.63] | <.001    | 0.41 [0.27-0.63] | <.001    |
| Family Income          |                  |          | 0.71 [0.62-0.82] | <.001    | 0.71 [0.62-0.81] | <.001    | 0.71 [0.62-0.81] | <.001    |
| Alcohol Use            |                  |          |                  |          | 1.18 [1.10-1.28] | <.001    | 1.18 [1.10-1.28] | <.001    |
| Psychological Distress |                  |          |                  |          |                  |          | 1.00 [0.96-1.04] | .974     |

464 OR: odds ratio, CI: confidence interval

1  
2  
3 465 **Figure Captions**

4  
5 466 Figure 1

6  
7  
8 467

9  
10  
11 468 **Figure 1. Odds ratios for purpose in life from multinomial logistic regression analysis**

12  
13  
14 469 **predicting smoking consumption (reference: non-smoker) with and without potential**

15  
16  
17 470 **confounding variables.**

18  
19  
20 471

21  
22 472 Model 5: without any adjustment; Model 6: adjusting for socioeconomic covariates (educational

23  
24  
25 473 attainment and family income); Model 7: adjusting for socioeconomic covariates and alcohol

26  
27  
28 474 consumption; Model 8: adjusting for socioeconomic covariates, alcohol consumption and

29  
30  
31 475 psychological distress. OR: Odds ratio.



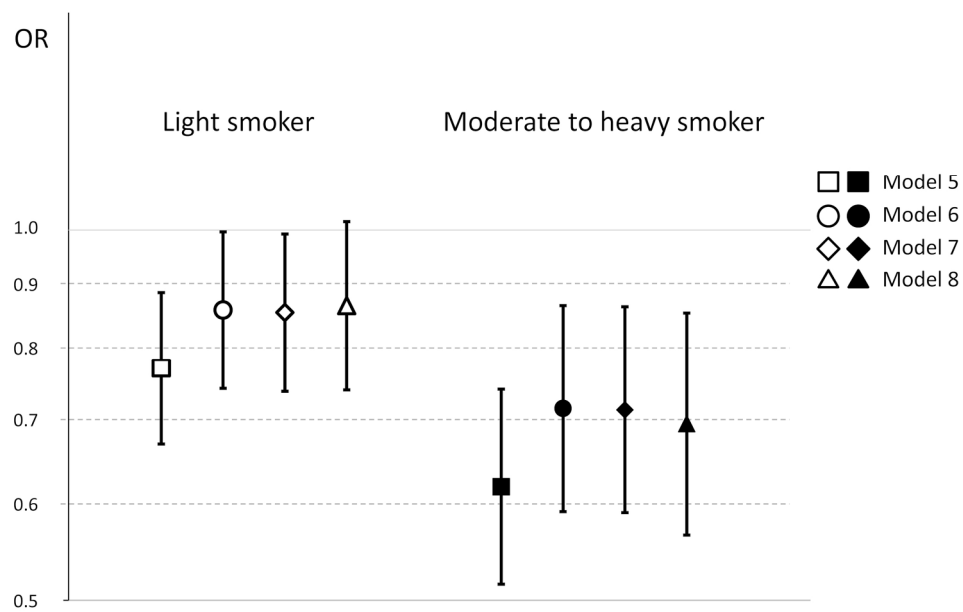

**Figure 1. Odds ratios for purpose in life from multinomial logistic regression analysis predicting smoking consumption (reference: non-smoker) with and without potential confounding variables.**

Model 5: without any adjustment; Model 6: adjusting for socioeconomic covariates (educational attainment and family income); Model 7: adjusting for socioeconomic covariates and alcohol consumption; Model 8: adjusting for socioeconomic covariates, alcohol consumption and psychological distress. OR: Odds ratio.

99x64mm (600 x 600 DPI)

## STROBE Statement—checklist of items that should be included in reports of observational studies

|                              | Item No | Recommendation                                                                                                                                                                             | Page No. |   |
|------------------------------|---------|--------------------------------------------------------------------------------------------------------------------------------------------------------------------------------------------|----------|---|
| <b>Title and abstract</b>    | 1       | (a) Indicate the study's design with a commonly used term in the title or the abstract                                                                                                     | 1,3      |   |
|                              |         | (b) Provide in the abstract an informative and balanced summary of what was done and what was found                                                                                        | 3-4      |   |
| <b>Introduction</b>          |         |                                                                                                                                                                                            |          |   |
| Background/<br>rationale     | 2       | Explain the scientific background and rationale for the investigation being reported                                                                                                       | 6-8      |   |
| Objectives                   | 3       | State specific objectives, including any prespecified hypotheses                                                                                                                           | 6-8      |   |
| <b>Methods</b>               |         |                                                                                                                                                                                            |          |   |
| Study design                 | 4       | Present key elements of study design early in the paper                                                                                                                                    | 8-9      |   |
| Setting                      | 5       | Describe the setting, locations, and relevant dates, including periods of recruitment, exposure, follow-up, and data collection                                                            | 8-9      |   |
| Participants                 | 6       | (a) <i>Cohort study</i> —Give the eligibility criteria, and the sources and methods of selection of participants. Describe methods of follow-up                                            | 8-9      |   |
|                              |         | <i>Case-control study</i> —Give the eligibility criteria, and the sources and methods of case ascertainment and control selection. Give the rationale for the choice of cases and controls |          |   |
|                              |         | <i>Cross-sectional study</i> —Give the eligibility criteria, and the sources and methods of selection of participants                                                                      |          |   |
|                              |         | (b) <i>Cohort study</i> —For matched studies, give matching criteria and number of exposed and unexposed                                                                                   |          | - |
|                              |         | <i>Case-control study</i> —For matched studies, give matching criteria and the number of controls per case                                                                                 |          |   |
| Variables                    | 7       | Clearly define all outcomes, exposures, predictors, potential confounders, and effect modifiers. Give diagnostic criteria, if applicable                                                   | 9-11     |   |
| Data sources/<br>measurement | 8*      | For each variable of interest, give sources of data and details of methods of assessment (measurement). Describe comparability of assessment methods if there is more than one group       | 9-11     |   |
| Bias                         | 9       | Describe any efforts to address potential sources of bias                                                                                                                                  | 8-9      |   |
| Study size                   | 10      | Explain how the study size was arrived at                                                                                                                                                  | 9        |   |
| Quantitative<br>variables    | 11      | Explain how quantitative variables were handled in the analyses. If applicable, describe which groupings were chosen and why                                                               | 9-12     |   |
| Statistical<br>methods       | 12      | (a) Describe all statistical methods, including those used to control for confounding                                                                                                      | 11-12    |   |
|                              |         | (b) Describe any methods used to examine subgroups and interactions                                                                                                                        | -        |   |
|                              |         | (c) Explain how missing data were addressed                                                                                                                                                | 9        |   |
|                              |         | (d) <i>Cohort study</i> —If applicable, explain how loss to follow-up was addressed                                                                                                        | -        |   |
|                              |         | <i>Case-control study</i> —If applicable, explain how matching of cases and controls was addressed                                                                                         |          |   |
|                              |         | <i>Cross-sectional study</i> —If applicable, describe analytical methods taking account of sampling strategy                                                                               |          |   |
|                              |         | (e) Describe any sensitivity analyses                                                                                                                                                      | -        |   |

Continued on next page

1  
2  
3  
4  
5  
6  
7  
8  
9  
10  
11  
12  
13  
14  
15  
16  
17  
18  
19  
20  
21  
22  
23  
24  
25  
26  
27  
28  
29  
30  
31  
32  
33  
34  
35  
36  
37  
38  
39  
40  
41  
42  
43  
44  
45  
46  
47  
48  
49  
50  
51  
52  
53  
54  
55  
56  
57  
58  
59  
60

| <b>Results</b>           |     |                                                                                                                                                                                                              |                              |
|--------------------------|-----|--------------------------------------------------------------------------------------------------------------------------------------------------------------------------------------------------------------|------------------------------|
| Participants             | 13* | (a) Report numbers of individuals at each stage of study—eg numbers potentially eligible, examined for eligibility, confirmed eligible, included in the study, completing follow-up, and analysed            | 12-13<br>Table 1             |
|                          |     | (b) Give reasons for non-participation at each stage                                                                                                                                                         | -                            |
|                          |     | (c) Consider use of a flow diagram                                                                                                                                                                           | -                            |
| Descriptive data         | 14* | (a) Give characteristics of study participants (eg demographic, clinical, social) and information on exposures and potential confounders                                                                     | 12-13<br>Table 1             |
|                          |     | (b) Indicate number of participants with missing data for each variable of interest                                                                                                                          | -                            |
|                          |     | (c) <i>Cohort study</i> —Summarise follow-up time (eg, average and total amount)                                                                                                                             | -                            |
| Outcome data             | 15* | <i>Cohort study</i> —Report numbers of outcome events or summary measures over time                                                                                                                          | -                            |
|                          |     | <i>Case-control study</i> —Report numbers in each exposure category, or summary measures of exposure                                                                                                         | -                            |
|                          |     | <i>Cross-sectional study</i> —Report numbers of outcome events or summary measures                                                                                                                           | 12-13<br>Table 1             |
| Main results             | 16  | (a) Give unadjusted estimates and, if applicable, confounder-adjusted estimates and their precision (eg, 95% confidence interval). Make clear which confounders were adjusted for and why they were included | 13-14<br>Table 2<br>Figure 1 |
|                          |     | (b) Report category boundaries when continuous variables were categorized                                                                                                                                    | 12-13<br>Table 1             |
|                          |     | (c) If relevant, consider translating estimates of relative risk into absolute risk for a meaningful time period                                                                                             | -                            |
| Other analyses           | 17  | Report other analyses done—eg analyses of subgroups and interactions, and sensitivity analyses                                                                                                               | -                            |
| <b>Discussion</b>        |     |                                                                                                                                                                                                              |                              |
| Key results              | 18  | Summarise key results with reference to study objectives                                                                                                                                                     | 15                           |
| Limitations              | 19  | Discuss limitations of the study, taking into account sources of potential bias or imprecision. Discuss both direction and magnitude of any potential bias                                                   | 16                           |
| Interpretation           | 20  | Give a cautious overall interpretation of results considering objectives, limitations, multiplicity of analyses, results from similar studies, and other relevant evidence                                   | 15-17                        |
| Generalisability         | 21  | Discuss the generalisability (external validity) of the study results                                                                                                                                        | 16-17                        |
| <b>Other information</b> |     |                                                                                                                                                                                                              |                              |
| Funding                  | 22  | Give the source of funding and the role of the funders for the present study and, if applicable, for the original study on which the present article is based                                                | 17-18                        |

\*Give information separately for cases and controls in case-control studies and, if applicable, for exposed and unexposed groups in cohort and cross-sectional studies.

**Note:** An Explanation and Elaboration article discusses each checklist item and gives methodological background and published examples of transparent reporting. The STROBE checklist is best used in conjunction with this article (freely available on the Web sites of PLoS Medicine at <http://www.plosmedicine.org/>, Annals of Internal Medicine at <http://www.annals.org/>, and Epidemiology at <http://www.epidem.com/>). Information on the STROBE Initiative is available at [www.strobe-statement.org](http://www.strobe-statement.org).

# BMJ Open

## Purpose in life and tobacco use among community-dwelling mothers of early adolescents

|                                 |                                                                                                                                                                                                                                                                                                                                                                                                                                                                                                                                                                                                                                                                                                                                                                                                                                                                                                                                                                                                                                                                                                                                                                                                                                                                                                                                                                                                                                 |
|---------------------------------|---------------------------------------------------------------------------------------------------------------------------------------------------------------------------------------------------------------------------------------------------------------------------------------------------------------------------------------------------------------------------------------------------------------------------------------------------------------------------------------------------------------------------------------------------------------------------------------------------------------------------------------------------------------------------------------------------------------------------------------------------------------------------------------------------------------------------------------------------------------------------------------------------------------------------------------------------------------------------------------------------------------------------------------------------------------------------------------------------------------------------------------------------------------------------------------------------------------------------------------------------------------------------------------------------------------------------------------------------------------------------------------------------------------------------------|
| Journal:                        | <i>BMJ Open</i>                                                                                                                                                                                                                                                                                                                                                                                                                                                                                                                                                                                                                                                                                                                                                                                                                                                                                                                                                                                                                                                                                                                                                                                                                                                                                                                                                                                                                 |
| Manuscript ID                   | bmjopen-2017-020586.R1                                                                                                                                                                                                                                                                                                                                                                                                                                                                                                                                                                                                                                                                                                                                                                                                                                                                                                                                                                                                                                                                                                                                                                                                                                                                                                                                                                                                          |
| Article Type:                   | Research                                                                                                                                                                                                                                                                                                                                                                                                                                                                                                                                                                                                                                                                                                                                                                                                                                                                                                                                                                                                                                                                                                                                                                                                                                                                                                                                                                                                                        |
| Date Submitted by the Author:   | 02-Mar-2018                                                                                                                                                                                                                                                                                                                                                                                                                                                                                                                                                                                                                                                                                                                                                                                                                                                                                                                                                                                                                                                                                                                                                                                                                                                                                                                                                                                                                     |
| Complete List of Authors:       | Morimoto, Yuko; Tokyo Metropolitan Institute of Medical Science, Department of Psychiatry and Behavioral Science<br>Yamasaki, Syudo; Tokyo Metropolitan Institute of Medical Science, Department of Psychiatry and Behavioral Science<br>Ando, Shuntaro; Graduate School of Medicine, The University of Tokyo, Department of Neuropsychiatry<br>Koike, Shinsuke; University of Tokyo Institute for Diversity & Adaptation of Human Mind (UTIDAHM), The University of Tokyo<br>Fujikawa, Shinya; Graduate School of Medicine, The University of Tokyo, Department of Neuropsychiatry<br>Kanata, Sho; Teikyo University School of Medicine, Department of Psychiatry<br>Endo, Kaori; Tokyo Metropolitan Institute of Medical Science, Department of Psychiatry and Behavioral Science<br>Nakanishi, Miharuru; Tokyo Metropolitan Institute of Medical Science, Department of Psychiatry and Behavioral Science<br>HATCH, STEPHANI; Institute of Psychiatry, Psychology & Neuroscience, King's College London, Department of Psychological Medicine<br>Richards, M; MRC Unit for Lifelong Health and Aging, University College London<br>Kasai, Kiyoto; Graduate School of Medicine, The University of Tokyo, Department of Neuropsychiatry<br>Hiraiwa-Hasegawa, Mariko; SOKENDAI (The Graduate University for Advanced Studies), School of Advanced Science<br>Nishida, Atsushi; Tokyo Metropolitan Institute of Medical Science, |
| <b>Primary Subject Heading</b>: | Smoking and tobacco                                                                                                                                                                                                                                                                                                                                                                                                                                                                                                                                                                                                                                                                                                                                                                                                                                                                                                                                                                                                                                                                                                                                                                                                                                                                                                                                                                                                             |
| Secondary Subject Heading:      | Addiction, Public health, Epidemiology                                                                                                                                                                                                                                                                                                                                                                                                                                                                                                                                                                                                                                                                                                                                                                                                                                                                                                                                                                                                                                                                                                                                                                                                                                                                                                                                                                                          |
| Keywords:                       | Purpose in life, Mother, Psychological distress, Tokyo Early Adolescence Survey (T-EAS), Tobacco use                                                                                                                                                                                                                                                                                                                                                                                                                                                                                                                                                                                                                                                                                                                                                                                                                                                                                                                                                                                                                                                                                                                                                                                                                                                                                                                            |
|                                 |                                                                                                                                                                                                                                                                                                                                                                                                                                                                                                                                                                                                                                                                                                                                                                                                                                                                                                                                                                                                                                                                                                                                                                                                                                                                                                                                                                                                                                 |

SCHOLARONE™  
Manuscripts



20 Place, London, WC1B 5JU, UK.

21 7: School of Advanced Science, SOKENDAI (The Graduate University for Advanced Studies),

22 Kanagawa, Japan. Shonan Village, Hayama, Kanagawa 240-0193, Japan.

23 \* Equal contributions as first author

## 25 **CORRESPONDING AUTHOR**

26 Atsushi Nishida, Department of Psychiatry and Behavioral Science,

27 Tokyo Metropolitan Institute of Medical Science, Tokyo, Japan.

28 Address: 2-1-6 Kamikitazawa, Setagaya-ku, Tokyo 156-8506, Japan.

29 E-mail: nishida-at@igakuken.or.jp

30 Tel: +81-3-6834-2296

31 Fax: +81-3-5316-3150

## 33 **WORD COUNT**

34 Abstract: 292 words

35 Main text: 2999 words (excluding title page, abstract, references, figures and tables, funding,

36 contributors, competing interests, ethical approval, data sharing statements, and strengths and

37 limitations of this study)

1  
2  
3 38 **ABSTRACT**  
4

5 39 **Objectives** The rising prevalence of tobacco use and tobacco-attributable deaths among women is of  
6  
7  
8 40 worldwide concern. In particular, smoking prevention for mothers in early midlife is a significant  
9  
10  
11 41 international public health goal. A higher sense of purpose in life is thought to reduce detrimental  
12  
13  
14 42 health behaviours. However, little is known about the association between a sense of purpose in life  
15  
16  
17 43 (PIL) and tobacco use. This study investigates this association among community-dwelling mothers  
18  
19  
20 44 of early adolescents.

21  
22 45 **Design** This population-based cross-sectional study uses a self-reported questionnaire from the  
23  
24  
25 46 Tokyo Early Adolescence Survey (T-EAS), a large community-based survey conducted in Japan  
26  
27  
28 47 between 2012 and 2014.

29  
30  
31 48 **Setting** Participants were randomly recruited from the resident registries of three municipalities in  
32  
33  
34 49 Tokyo, Japan.

35  
36  
37 50 **Participants** A total of 4,478 children and their primary parents participated. Responses from 4,063  
38  
39  
40 51 mothers with no missing data were analysed (M age = 42.0 years [SD=4.2]).

41  
42 52 **Measures** Participants' tobacco use, including the number of cigarettes smoked per day, was  
43  
44  
45 53 documented using a questionnaire. PIL was assessed using a Purpose in Life scale derived from  
46  
47  
48 54 Ryff's Psychological Well-Being Scale.

49  
50  
51 55 **Results** Greater PIL was associated with a decreased likelihood of tobacco use, even when adjusted  
52  
53  
54 56 for confounders (OR = 0.80, 95%CI 0.70 to 0.91). Multinomial logistic regression analyses revealed

1  
2  
3 57 that PIL was inversely associated with tobacco consumption among mothers. These associations  
4  
5 58 remained after controlling for psychological distress, socioeconomic factors, and frequency of  
6  
7  
8 59 alcohol consumption among moderate to heavy smokers (OR = 0.70, 95%CI 0.57 to 0.86), while  
9  
10  
11 60 attenuated among light smokers.

12  
13  
14 61 **Conclusions** Increasing PIL may be a valuable intervention for reducing tobacco use among women  
15  
16  
17 62 in early midlife. This study can contribute to our understanding of the psychology of smoking  
18  
19  
20 63 behaviour, and shed light on the targeted intervention to reduce tobacco use among early midlife  
21  
22  
23 64 mothers.

## 24 25 26 27 28 66 **KEYWORDS**

29  
30  
31 67 Purpose in life, Mother, Psychological distress, Tokyo Early Adolescence Survey (T-EAS), Tobacco  
32  
33  
34 68 use

## 35 36 37 38 39 70 **STRENGTHS AND LIMITATIONS OF THIS STUDY**

- 40  
41  
42 71 • The study investigated the association between a sense of purpose in life (PIL) and tobacco use  
43  
44  
45 72 among community dwelling mothers in early midlife.
- 46  
47  
48 73 • Data were collected from a large community-based sample of mothers in early-middle age,  
49  
50  
51 74 randomly recruited from the resident registries of three municipalities in Tokyo.
- 52  
53  
54 75 • We demonstrated the association between PIL and tobacco use while controlling for confounders,  
55  
56  
57



1  
2  
3  
4  
5  
6  
7  
8  
9  
10  
11  
12  
13  
14  
15  
16  
17  
18  
19  
20  
21  
22  
23  
24  
25  
26  
27  
28  
29  
30  
31  
32  
33  
34  
35  
36  
37  
38  
39  
40  
41  
42  
43  
44  
45  
46  
47  
48  
49  
50  
51  
52  
53  
54  
55  
56  
57  
58  
59  
60

76 including demographic variables and psychological distress.

77 ▪ The study adopted a cross sectional design and was limited to determining a causal relationship

78 between PIL and tobacco use.

For peer review only

## 79 INTRODUCTION

80

81 The tobacco epidemic is one of the most significant international public health threats.

82 Globally, more than one in ten adult deaths is estimated to be due to tobacco. The World Health

83 Organization is particularly concerned about the possibility that the global increase in deaths due to

84 tobacco is driven by the accelerating rate of tobacco use in women.<sup>1</sup> Smoking prevalence among

85 women is not decreasing, while that among men has been decreasing rapidly during the past three

86 decades in Japan.<sup>2</sup> Tobacco use among women is dramatically increasing among those between 30

87 and 50 years old,<sup>3</sup> and tobacco cessation in early midlife is associated with a substantial decline in

88 mortality risk for women.<sup>4,5</sup> In addition, maternal smoking is the major determinant of child's passive

89 smoking<sup>6</sup> and smoking initiation.<sup>7</sup> Smoking prevention for women, especially mothers, in early

90 midlife, is therefore a significant international public health goal.

91 We examined the association between purpose in life (PIL) and tobacco use in women in

92 early midlife. PIL is a component of psychological eudaemonic well-being, and refers to the extent to

93 which individuals regard their own life as meaningful.<sup>8</sup> Previous studies, which have mainly

94 examined elderly populations, have shown that a higher sense of PIL is associated with reduced risk

95 for diseases (e.g. Alzheimer's disease,<sup>9</sup> myocardial infarction,<sup>10</sup> stroke,<sup>11</sup> cerebral infarctions<sup>12</sup>) and

96 with better physical function<sup>13</sup> and lower mortality.<sup>14-19</sup> A growing body of research indicates the

97 existence of links between PIL and health behaviours<sup>20</sup> (e.g. use of preventive health care services,<sup>21</sup>

1  
2 98 daily exercise,<sup>22-24</sup> maintenance of a healthy diet,<sup>25 26</sup> preventive behaviours for breast cancer.<sup>23</sup>).  
3  
4  
5 99 Recent systematic review showed that greater PIL is related to a range of better health outcomes for  
6  
7  
8 100 older adults.<sup>27</sup> The significance of PIL on better health is recently recognized cross-culturally (e.g.  
9  
10  
11 101 Ikigai in Japanese). Recent evidence demonstrated that PIL was associated with healthy  
12  
13  
14 102 glucoregulation among Japanese adults,<sup>28</sup> which had also demonstrated in Western countries.<sup>29</sup> In  
15  
16  
17 103 contrast, lower PIL is associated with detrimental health behaviours. Previous research in this area  
18  
19  
20 104 has mainly concentrated on the association between PIL and addiction.<sup>30-33</sup>

21  
22 105 Previous studies suggested that interventions and promotions focusing on psychological  
23  
24  
25 106 factors were important for smoking prevention and cessation among women. Meta-analyses have  
26  
27  
28 107 shown that women have more difficulty maintaining long-term smoking cessation than men,<sup>34</sup> and  
29  
30  
31 108 nicotine replacement therapy for smoking cessation is less effective in women than in men, in  
32  
33  
34 109 particular for supporting long-term maintenance of smoking cessation.<sup>35</sup> Another meta-analysis  
35  
36  
37 110 demonstrated that motivational interviewing, which is a psychological approach used to enhance PIL  
38  
39  
40 111 among people with addictive behaviours, could be effective for tobacco cessation.<sup>36</sup>

41  
42 112 Purpose in life might be a significant psychological factor for promoting tobacco cessation  
43  
44  
45 113 among women. However, relatively little is known about the association between PIL and tobacco  
46  
47  
48 114 use, with no study to date examining this association in women in early midlife. A previous survey  
49  
50  
51 115 on 341 adults in Hungary<sup>37</sup> demonstrated that daily smokers had lower PIL than non-smokers,  
52  
53  
54 116 although the sample was limited to a small number and did not focus on women in early midlife. In  
55  
56  
57  
58  
59  
60

1  
2  
3 117 the current study, we hypothesized that PIL is inversely associated with tobacco use among early  
4  
5 118 midlife mothers, even after controlling for demographic variables and the effect of psychological  
6  
7  
8 119 distress. Psychological distress (depression and/or anxiety) often co-occurs with tobacco use.<sup>38-45</sup>  
9  
10  
11 120 Since psychological distress (ill-being) is inversely associated with PIL<sup>8 46 47</sup> and is positively  
12  
13  
14 121 associated with substance abuse,<sup>31 32</sup> it could confound associations between PIL and tobacco use.  
15  
16  
17 122 We also hypothesized that PIL is inversely associated with the amount of tobacco consumption.  
18  
19  
20 123

## 124 **METHODS**

### 126 **Study design, sample, and survey procedure**

127  
128 This study used data from the Tokyo Early Adolescence Survey (T-EAS)<sup>48 49</sup> which was  
129 originally designed as a baseline survey for the Tokyo Teen Cohort, a currently ongoing longitudinal  
130 cohort study (URL: <http://ttcp.umin.jp/index.html>). The T-EAS is a multidisciplinary survey of  
131 10-year-old adolescents and their primary caregivers (98.5% mothers). The T-EAS contains  
132 questions about tobacco use, PIL, and psychological distress, as well as a variety of other potentially  
133 confounding variables. Participants were randomly recruited from the resident registries of three  
134 municipalities in Tokyo: Setagaya Ward, Mitaka City, and Chofu City. Participants were sent  
135 invitation letters on or around the child's tenth birthday. The survey was completed in two home

1  
2  
3 136 visits. During the first visit, written informed consent from the primary caregiver (generally the  
4  
5 137 mother) was obtained; participants were then asked to complete the questionnaires at home before  
6  
7  
8 138 the second visit. During the second visit, both the adolescent and the primary caregiver were each  
9  
10  
11 139 asked to complete the self-report questionnaires separately. The questionnaires were enclosed in  
12  
13  
14 140 envelopes by the respondents immediately after completion. In addition, the primary caregiver  
15  
16  
17 141 responded to a semi-structured interview. All data were collected anonymously. The T-EAS was  
18  
19  
20 142 conducted by three research institutes: Tokyo Metropolitan Institute of Medical Science, The  
21  
22 143 University of Tokyo, and SOKENDAI (The Graduate University for Advanced Studies). This survey  
23  
24  
25 144 was approved by the ethics committees of these three institutes.  
26  
27  
28  
29  
30

## 31 146 **Participants**

32  
33  
34 147

35  
36  
37 148 A total of 4,478 children and their primary parents participated in the Tokyo Early  
38  
39  
40 149 Adolescence Survey (T-EAS) (response rate 43.8%). We used the primary parent data for the  
41  
42  
43 150 purposes of the current study. Of the 4,478 respondents, 68 were men, and were hence excluded to  
44  
45  
46 151 focus the investigation on the association between PIL and tobacco use in women. An additional 347  
47  
48  
49 152 female respondents' data were excluded due to incomplete answers to the questions on tobacco use,  
50  
51  
52 153 PIL, psychological distress, or other confounding variables. The final dataset therefore contained  
53  
54  
55 154 data from 4,063 respondents.  
56  
57  
58  
59  
60

155

**Measures**

157

**Tobacco Use**

159 Respondents were asked whether they used tobacco. Those who answered 'yes' were  
160 subsequently asked about the number of cigarettes they smoked per day. A binary variable was  
161 created ('0: non-smokers' versus '1: smokers'), based on the first question. Respondents were then  
162 split into: '0: non-smokers', '1: light smokers (less than half a pack [= 10 cigarettes] per day)', and  
163 '2: moderate to heavy smokers (more than or equal to half a pack per day)', to assess potential  
164 dose-response effects.

165

**Purpose in Life**

167 PIL was assessed using a 14-item version of the Purpose in Life scale derived from Ryff's  
168 Psychological Well-Being scales.<sup>8</sup> The scale included items such as 'I have a sense of direction and  
169 purpose in life', and 'My daily activities often seem trivial and unimportant to me' (reverse coded).  
170 Each item was rated on a 6-point Likert scale (1: strongly disagree; 6: strongly agree) and scores  
171 were summed, so that continuous scores ranged from 14 to 84. Higher scores indicated a higher  
172 sense of PIL.

173

1  
2  
3 174 Psychological Distress  
4

5 175 Psychological distress was assessed using the K6.<sup>50</sup> This survey contains six items,  
6  
7  
8 176 assessing how frequently during the past 30 days respondents felt: i) so depressed that nothing could  
9  
10  
11 177 cheer them up, ii) hopeless, iii) restless or fidgety, iv) that everything was an effort, v) worthless, and  
12  
13  
14 178 vi) nervous. Each item was scored on a 5-point Likert scale (0: never; 4: most of the time). Scores  
15  
16  
17 179 were summed, with the resulting raw scores ranging from 0 to 24. Higher scores indicate more  
18  
19  
20 180 frequent psychological distress during the past 30 days.  
21  
22

23 181

24  
25 182 Other covariates  
26  
27

28 183 The following covariates were examined for their potential confounding effects: age,  
29  
30  
31 184 educational attainment, marital status, annual family income, and frequency of alcohol consumption.  
32  
33  
34 185 High socioeconomic status (represented by educational attainment and annual family income here) is  
35  
36  
37 186 known to be associated with higher PIL,<sup>46</sup> and socioeconomic disadvantage is a risk factor for  
38  
39  
40 187 tobacco use.<sup>51-54</sup> Educational attainment was coded as follows: '1: junior high school or lower', '2:  
41  
42  
43 188 high school', '3: technical or junior college', and '4: 4-year university or higher'. Marital status was  
44  
45  
46 189 dichotomized as '1: yes' or '0: no', depending on whether the respondent was in a marriage or  
47  
48  
49 190 marriage-like relationship. Family income over the past year was divided into four categories: '1:  
50  
51  
52 191 less than 4 million yen', '2: 4–6 million yen', '3: 7–9 million yen', and '4: over 10 million yen'.  
53  
54 192 Frequency of alcohol consumption was assessed using a 5-point Likert scale (0: do not drink; 4:  
55  
56  
57  
58  
59  
60

1  
2  
3 193 more than 4 times a week).

4  
5 194

6  
7  
8 195 Statistical analyses

9  
10  
11 196 Cross tabulation, chi-square tests and residual analyses were conducted to test the

12  
13  
14 197 differences between three groups based on the amounts of tobacco used (none, light, and moderate to

15  
16  
17 198 heavy smokers), and covariates in categorical variables as well as ANOVAs were used in continuous

18  
19  
20 199 variables. Correlation coefficients among all variables also examined. We conducted binomial

21  
22  
23 200 logistic regression analyses (using a binary dependent variable: non-smokers vs. smokers) to test the

24  
25  
26 201 association between PIL and tobacco use. The PIL score was standardized to report odds ratios per

27  
28  
29 202 one standard deviation change of PIL scores. Logistic regression model 1 was unadjusted for

30  
31  
32 203 covariates; model 2 was adjusted for socioeconomic covariates: age, education, marital status, and

33  
34  
35 204 family income; model 3 was further adjusted for alcohol consumption; and finally, model 4 was

36  
37  
38 205 further adjusted for psychological distress. In order to further examine the relationship between PIL

39  
40  
41 206 and tobacco use, we conducted multinomial logistic regression analyses to assess the effect of PIL on

42  
43  
44 207 the degree of tobacco use. Regression models 5 to 8 were identical to models 1 to 4, except that the

45  
46  
47 208 dependent variable was multivariate: non-smokers, light smokers, and moderate or heavy smokers.

48  
49  
50 209

51 210 Patient involvement

52  
53  
54 211 Patients were not involved in developing the study hypothesis, recruitment, outcome measures, study



212 design, or implementation. Patients were not involved in interpretation or writing up on the results.

213 There are no plans to disseminate the results of the research to study participants or the relevant

214 patient community.

215

## 216 **RESULTS**

217

### 218 **Prevalence of smokers and corresponding descriptive statistics**

219

220 Of the 4,063 respondents (mean age 42.0 years, standard deviation 4.2; 95.8% married;

221 40.1% achieved a degree from a 4-year university or higher; 8.8% had family income less than 4

222 million yen), 324 (8.0%) were smokers. 204 (5.0%) were light smokers, 120 (3.0%) were moderate

223 to heavy smokers. Chi-square tests and ANOVA indicated that inverse associations were clearly

224 evident between tobacco use and PIL, age, education, marital status, and annual family income

225 (Table 1). Residual analyses indicated that lower educational attainment (light smokers with junior

226 high school or lower education [adjusted residuals = 6.9,  $p < .01$ ] and those with high school

227 education [adjusted residuals = 6.9,  $p < .01$ ]; moderate or heavy smokers with junior high school or

228 lower education [adjusted residuals = 7.0,  $p < .01$ ] and those with high school education [adjusted

229 residuals = 7.6,  $p < .01$ ]), not being married (light smokers without being married [adjusted residuals

230 = 4.8,  $p < .01$ ]; moderate to heavy smokers without being married [adjusted residuals = 8.3,  $p < .01$ ]),

1  
2  
3 231 lower family income (light smokers with the lowest family income (less than 4 million yen)  
4  
5 232 [adjusted residuals = 6.1,  $p < .01$ ] and those with the second lowest family income (4 to 6 million  
6  
7  
8 233 yen) [adjusted residuals = 2.6,  $p < .01$ ]; moderate to heavy smokers with the lowest family income  
9  
10  
11 234 [adjusted residuals = 6.7,  $p < .01$ ] and those with the second lowest family income [adjusted residuals  
12  
13  
14 235 = 4.7,  $p < .01$ ]), and the most frequent alcohol use (light smokers with the most frequent alcohol  
15  
16  
17 236 consumption (more than 4 times a week) [adjusted residuals = 6.6,  $p < .01$ ]; moderate to heavy  
18  
19  
20 237 smokers with the most frequent alcohol use [adjusted residuals = 2.7,  $p < .01$ ]) were associated with  
21  
22 238 increasing tobacco use. Psychological distress was higher in smokers than in non-smokers (Table 1).  
23  
24  
25 239 On the other hand, the highest alcohol consumption was reported by light smokers (Table 1). PIL was  
26  
27  
28 240 positively correlated with age, educational attainment, family annual income while negatively  
29  
30  
31 241 correlated with tobacco consumption and psychological distress (Table 2). Tobacco consumption was  
32  
33  
34 242 positively correlated with alcohol consumption and psychological distress while negatively  
35  
36  
37 243 correlated with age, educational attainment, marital status and family annual income (Table 2). Age,  
38  
39  
40 244 educational attainment and family annual income were positively correlated among each other.  
41  
42  
43 245 Marital status was positively correlated with educational attainment and family annual income.  
44  
45  
46 246 Psychological distress was positively correlated with age while negatively correlated with marital  
47  
48  
49 247 status and family annual income (Table 2).  
50

51 248 *[Insert Table 1 about here]*

52  
53  
54 249 *[Insert Table 2 about here]*

250

**251 The association between PIL and tobacco use**

252

253 Table 3 shows the binominal odds ratios for tobacco use compared to no smoking. PIL was  
254 strongly inversely associated with tobacco use in the analysis without covariates (Model 1). The odds  
255 ratio was not attenuated after adjusting for socioeconomic variables (Model 2). This was also the  
256 case after adjusting for alcohol consumption (Model 3) and finally, for psychological distress (Model  
257 4). With regard to the covariates in the fully adjusted model, educational attainment, marital status,  
258 and family annual income were inversely associated with tobacco use. There was a positive  
259 association between tobacco use and frequency of alcohol consumption. Psychological distress was  
260 not associated with tobacco use.

261

262

[Insert Table 3 about here]

263

**264 The association between PIL and amount of tobacco consumption**

265

266 Figure 1 shows the odds ratios for smoking consumption, produced by multinomial logistic  
267 regressions comparing light and moderate to heavy smoking against the no smoking reference  
268 category. Without any adjustment (Model 5), PIL was inversely associated with both light and

1  
2  
3 269 moderate to heavy smoking (light smoking: OR = 0.77, 95%CI: 0.67-0.89,  $p < .001$ ; moderate to  
4  
5 270 heavy smoking: OR = 0.62, 95%CI: 0.52-0.74,  $p < .001$ ). The odds ratios remained significant after  
6  
7  
8 271 adjusting for socioeconomic covariates (Model 6: light smoking: OR = 0.86, 95%CI: 0.74-1.00,  $p =$   
9  
10  
11 272 0.046; moderate to heavy smoking: OR = 0.72, 95%CI: 0.59-0.87,  $p < .001$ ) and further adjustment  
12  
13  
14 273 for alcohol consumption (Model 7: light smoking: OR = 0.86, 95%CI: 0.74-0.99,  $p = 0.041$ ;  
15  
16  
17 274 moderate to heavy smoking: OR = 0.71, 95%CI: 0.59-0.87,  $p < .001$ ). Adjusting further for  
18  
19  
20 275 psychological distress (Model 8), the association between PIL and light smoking was not significant  
21  
22  
23 276 (OR = 0.87, 95%CI: 0.74-1.02,  $p = 0.079$ ). On the other hand, the odds ratio for moderate to heavy  
24  
25  
26 277 smoking was not attenuated after adjustment for any of the aforementioned variables (OR = 0.70,  
27  
28 278 95%CI: 0.57-0.86,  $p < .001$ ; See Figure 1).

29  
30  
31 279  
32  
33  
34 280 *[Insert Figure 1 about here]*  
35  
36  
37 281

## 38 39 282 **DISCUSSION**

40  
41  
42 283  
43  
44  
45 284 In a community-based sample of mothers in early-middle age, we found that PIL was  
46  
47  
48 285 inversely associated with tobacco use after controlling for age, education, marital status, family  
49  
50  
51 286 income, and alcohol use. Importantly, this was also the case even after taking psychological distress  
52  
53  
54 287 into account. PIL was also inversely associated with the risk of moderate to heavy tobacco

1  
2  
3 288 consumption even after controlling for covariates. This result is consistent with that of a previous  
4  
5 289 study on a community sample in Hungary.<sup>37</sup> We confirmed the association between PIL and tobacco  
6  
7  
8 290 use with a large population-based sample of women in early midlife in Japan.  
9

10  
11 291 It is possible that individuals with higher PIL are likely to invest in healthy behaviours  
12  
13  
14 292 because they feel that their lives are meaningful, have a greater will to live and, therefore, are more  
15  
16  
17 293 proactive in taking care of their health<sup>21</sup> (e.g., by the avoidance of smoking). They may also be  
18  
19  
20 294 motivated to acquire knowledge regarding health maintenance (i.e., the knowledge about how  
21  
22  
23 295 detrimental smoking is). In contrast, since those low in PIL lack a high sense of life's  
24  
25  
26 296 meaningfulness, it may seem pointless for them to protect their health, and they may prefer  
27  
28 297 short-term gratification, such as that obtained through tobacco use.  
29  
30

31 298 The association between PIL and tobacco use was robust even when controlling for  
32  
33  
34 299 psychological distress. It may suggest a relationship between a lack of eudaemonic well-being (PIL)  
35  
36  
37 300 and tobacco use, rather than a relationship between ill-being (psychological distress) and tobacco  
38  
39  
40 301 use. Mental well-being and mental illness are correlated but belong to separate continua, with  
41  
42  
43 302 well-being referring to the presence of positive feelings and positive functioning, rather than just the  
44  
45 303 absence of mental illness.<sup>55 56</sup>  
46  
47

48 304 The present results suggest that increasing PIL may be a valuable target of intervention for  
49  
50  
51 305 reducing tobacco use, as well as for reducing substance abuse.<sup>32</sup> PIL is modifiable<sup>57 58</sup> and increasing  
52  
53  
54 306 awareness of one's values or long-term goals in life could increase the sense of PIL.<sup>59 60</sup> A systematic  
55  
56  
57  
58  
59  
60

1  
2  
3 307 review indicated positive psychological intervention (PPI) had an impact on improving  
4  
5 308 psychological well-being,<sup>61</sup> as well as a meta-analysis showed behavioural intervention had a  
6  
7  
8 309 moderate effect on improving psychological well-being including PIL.<sup>62</sup> A new community-based  
9  
10  
11 310 group intervention to promote psychological well-being has been developed and had a positive effect  
12  
13  
14 311 of improving PIL.<sup>63</sup> Promotion focusing on increasing PIL might be effective in reducing tobacco  
15  
16  
17 312 use in public settings.

18  
19  
20 313 This study is limited of course, in its capacity to determine causality, since the data were  
21  
22  
23 314 cross-sectional. Longitudinal studies should be conducted in order to determine whether PIL has a  
24  
25  
26 315 role in tobacco use. We are currently conducting a subsequent longitudinal cohort study (Tokyo Teen  
27  
28  
29 316 Cohort Study), which will further clarify causality between PIL and tobacco use among mothers. The  
30  
31  
32 317 sample was limited only to mothers and we could not examine the association among early-middle  
33  
34  
35 318 aged women without children. Further studies including them would be needed. Additionally, given  
36  
37  
38 319 that parental smoking, especially maternal smoking, is the major determinant of passive smoking<sup>6</sup>  
39  
40  
41 320 and smoking initiation<sup>7</sup> in children, follow-up studies should examine the transgenerational effects of  
42  
43  
44 321 mothers' tobacco use on the initiation of smoking in their children. The relatively low response rate  
45  
46  
47 322 (43.8%) was also a limitation of the study. A recent study indicated that response rates of national  
48  
49  
50 323 cross-sectional surveys in Japan have declined in the recent decade (from around 70% to 50%).<sup>64</sup>  
51  
52  
53 324 One reason would be that many apartment buildings in Tokyo have recently adopted an automated  
54  
55  
56 325 system that enables residents talk with visitors at the locked gate through video. It allows potential

1  
2  
3 326 respondents to make a decision of refusing participation without having a face-to-face encounter  
4  
5 327 with the field worker.<sup>64</sup> In future study, we should consider how to overcome this obstacle to achieve  
6  
7  
8 328 higher response rate in general population survey in Tokyo.  
9

10  
11 329 In summary, in a large community-based study, we found that high PIL is associated with  
12  
13  
14 330 lower consumption of tobacco among mothers, after controlling for a range of potential confounds,  
15  
16  
17 331 including psychological distress. Our hypothesis, that PIL is independently and inversely associated  
18  
19  
20 332 with tobacco use, was therefore confirmed. This study may contribute to our understanding of the  
21  
22  
23 333 psychology of smoking behaviour and shed light on the target for intervention to reduce tobacco use  
24  
25  
26 334 among early midlife mothers.  
27

28 335

### 31 336 **Contributors**

32  
33  
34 337 YM, SY, SA, SKoike, AN, MHH and KK involved in launching and maintaining the survey.  
35  
36  
37 338 SF, SKanata and KE have mainly contributed to data collection. MN, SLH and MR mainly  
38  
39  
40 339 contributed to design the study and proposing the analysis and interpretation of data. YM and SY  
41  
42  
43 340 wrote the first draft of the manuscript and all the other authors have critically reviewed it. All authors  
44  
45  
46 341 approved the final version of the manuscript.  
47

48 342

### 51 343 **Funding**

52  
53  
54 344 This study was supported by a Japan Scientific Research Grant on an Innovative Area from the  
55  
56

1  
2  
3 345 Ministry of Education, Culture, Sports, Science and Technology (MEXT KAKENHI 23118002); a  
4  
5 346 Japan Scientific Research Grant on an Innovative Area from the Japan Society for the Promotion of  
6  
7  
8 347 Science (JSPS KAKENHI 16H06395, 16H06398, 16K21720); a Grant-in-Aid for Challenging  
9  
10  
11 348 Exploratory Research from the Japan Society for the Promotion of Science (JSPS KAKENHI  
12  
13  
14 349 16K13499); a Grant-in-Aid for Scientific Research (B) from the Japan Society for the Promotion of  
15  
16  
17 350 Science (JSPS KAKENHI 16H03745); and a Tokyo Metropolitan Institute of Medical Science  
18  
19  
20 351 Project Grant (Kokoronokenko H27-H31). However, these funding sources had no involvement in  
21  
22  
23 352 the study design; in the collection, analysis and interpretation of data; in the writing of the articles; or  
24  
25  
26 353 in the decision to submit it for publication.  
27  
28  
29  
30

### 31 355 **Competing interests**

32  
33  
34 356 None.  
35  
36  
37 357

### 38 39 358 **Ethics approval**

40  
41  
42 359 This study was conducted by three research institutes: Tokyo Metropolitan Institute of Medical  
43  
44  
45 360 Science, The University of Tokyo, and SOKENDAI (The Graduate University for Advanced  
46  
47  
48 361 Studies). This study was approved by the ethics committees of these three institutes.  
49  
50  
51 362

### 52 53 54 363 **Data sharing statement**



1  
2  
3 364 This study was planned and conducted in accordance with the ethics committee of Tokyo  
4  
5 365 Metropolitan Institute of Medical Science. When applying to the research ethics committee for the  
6  
7  
8 366 data set, the authors did not request this to be released as public data. However, the data can be made  
9  
10  
11 367 available to all interested researchers upon request to Dr. Atsushi Nishida, Ph.D.  
12  
13  
14 368 (nishida-at@igakuken.or.jp).  
15

16 369  
17  
18  
19  
20  
21  
22  
23  
24  
25  
26  
27  
28  
29  
30  
31  
32  
33  
34  
35  
36  
37  
38  
39  
40  
41  
42  
43  
44  
45  
46  
47  
48  
49  
50  
51  
52  
53  
54  
55  
56  
57  
58  
59  
60

1  
2 370 **REFERENCES**

- 3  
4 371 1 World Health Organization. WHO global report on mortality attributable to tobacco. Geneva:  
5  
6  
7 372 World Health Organization 2012.
- 8  
9  
10 373 2 Funatogawa I, Funatogawa T, Yano E. Trends in smoking and lung cancer mortality in Japan, by  
11  
12 374 birth cohort, 1949–2010. *Bull World Health Organ* 2013;91:332–40.  
13  
14  
15 375 doi:10.2471/BLT.12.108092.
- 16  
17  
18 376 3 Lopez AD, Collishaw NE, Piha T. A descriptive model of the cigarette epidemic in developed  
19  
20  
21 377 countries. *Tob Control* 1994;3:242–7. doi:10.1136/tc.3.3.242.
- 22  
23  
24 378 4 Gram IT, Sandin S, Braaten T, et al. The hazards of death by smoking in middle-aged women. *Eur*  
25  
26  
27 379 *J Epidemiol* 2013;28:799–806. doi:10.1007/s10654-013-9851-6.
- 28  
29  
30 380 5 Pirie K, Peto R, Reeves GK, et al. The 21st century hazards of smoking and benefits of stopping: a  
31  
32 381 prospective study of one million women in the UK. *Lancet* 2013;381:133–41.  
33  
34  
35 382 doi:10.1016/S0140-6736(12)61720-6.
- 36  
37  
38 383 6 Stiby AI, Macleod J, Hickman M, et al. Association of maternal smoking with child cotinine levels.  
39  
40  
41 384 *Nicotine Tob Res* 2013;15:2029–36. doi:10.1093/ntr/ntt094.
- 42  
43  
44 385 7 Voorhees CC, Ye C, Carter-Pokras O, et al. Peers, tobacco advertising, and secondhand smoke  
45  
46  
47 386 exposure influences smoking initiation in diverse adolescents. *Am J Health Promot* 2011;25:  
48  
49  
50 387 e1–11. doi:10.4278/ajhp.090604-QUAN-180.
- 51  
52  
53 388 8 Ryff CD. Happiness is everything, or is it? Explorations on the meaning of psychological  
54  
55 389 well-being. *J Pers Soc Psychol* 1989;57:1069–81. doi:10.1037/0022-3514.57.6.1069.

- 1  
2  
3 390 9 Boyle PA, Buchman AS, Barnes LL, et al. Effect of a purpose in life on risk of incident Alzheimer  
4  
5 391 disease and mild cognitive impairment in community-dwelling older persons. *Arch Gen*  
6  
7  
8 392 *Psychiatry* 2010;67:304–10. doi:10.1001/archgenpsychiatry.2009.208.  
9  
10  
11 393 10 Kim ES, Sun JK, Park N, et al. Purpose in life and reduced risk of myocardial infarction among  
12  
13  
14 394 older US adults with coronary heart disease: a two-year follow-up. *J Behav Med*  
15  
16 395 2013a;36:124–33. doi:10.1007/s10865-012-9406-4.  
17  
18  
19 396 11 Kim ES, Sun JK, Park N, et al. Purpose in life and reduced incidence of stroke in older adults:  
20  
21  
22 397 ‘The Health and Retirement Study’. *J Psychosom Res* 2013b;74:427–32.  
23  
24 398 doi:10.1016/j.jpsychores.2013.01.013.  
25  
26  
27  
28 399 12 Yu L, Boyle PA, Wilson RS, et al. Purpose in life and cerebral infarcts in community-dwelling  
29  
30  
31 400 older people. *Stroke* 2015;46:1071–6. doi:10.1161/STROKEAHA.114.008010.  
32  
33  
34 401 13 Kim ES, Kawachi I, Chen Y, et al. Association between purpose in life and objective measures of  
35  
36  
37 402 physical function in older adults. *JAMA Psychiatry* 2017;1039–45.  
38  
39 403 doi:10.1001/jamapsychiatry.2017.2145.  
40  
41  
42 404 14 Boyle PA, Barnes LL, Buchman AS, et al. Purpose in life is associated with mortality among  
43  
44  
45 405 community-dwelling older persons. *Psychosom Med* 2009;71:574–9.  
46  
47 406 doi:10.1097/PSY.0b013e3181a5a7c0.  
48  
49  
50  
51 407 15 Cohen R, Bavishi C, Rozanski A. Purpose in life and its relationship to all-cause mortality and  
52  
53  
54 408 cardiovascular events: a meta-analysis. *Psychosom Med* 2016;78:122–33.  
55  
56  
57  
58  
59  
60

1  
2  
3 409 doi:10.1097/PSY.0000000000000274.  
4

5 410 16 Hill PL, Turiano NA. Purpose in life as a predictor of mortality across adulthood. *Psychol Sci*  
6  
7  
8 411 2014;25:1482–6. doi:10.1177/0956797614531799.  
9

10  
11 412 17 Koizumi M, Ito H, Kaneko Y, et al. Effect of having a sense of purpose in life on the risk of death  
12  
13  
14 413 from cardiovascular diseases. *J Epidemiol* 2008;18:191–6. doi:10.2188/jea.JE2007388.  
15

16  
17 414 18 Krause, N. Meaning in life and mortality. *J Gerontol B Psychol Sci Soc Sci* 2009;64:517–27.  
18  
19 415 doi:10.1093/geronb/gbp047.  
20

21  
22 416 19 Sone T, Nakaya N, Ohmori K, et al. Sense of life worth living (ikigai) and mortality in Japan:  
23  
24  
25 417 Ohsaki Study. *Psychosom Med* 2008;70:709–15. doi:10.1097/PSY.0b013e31817e7e64.  
26

27  
28 418 20 Roepke AM, Jayawickreme E, Riffle OM. Meaning and health: a systematic review. *Appl Res*  
29  
30  
31 419 *Qual Life* 2014;9:1055–79. doi:10.1007/s11482-013-9288-9.  
32

33  
34 420 21 Kim ES, Strecher VJ, Ryff CD. Purpose in life and use of preventive health care services. *Proc*  
35  
36  
37 421 *Natl Acad Sci U.S.A.* 2014;111:16331–6. doi:10.1073/pnas.1414826111.  
38

39  
40 422 22 Holahan CK, Holahan CJ, Suzuki R. Purposiveness, physical activity, and perceived health in  
41  
42  
43 423 cardiac patients. *Disabil Rehabil* 2008;30:1772–8. doi:10.1080/10428190701661508.  
44

45  
46 424 23 Holahan CK, Suzuki R. Motivational factors in health promoting behavior in later aging. *Act*  
47  
48  
49 425 *Adapt Aging* 2006;30:47–60. doi:10.1300/J016v30n01\_03.  
50

51  
52 426 24 Hooker SA, Masters KS. Purpose in life is associated with physical activity measured by  
53  
54  
55 427 accelerometer. *J Health Psychol* 2014;21:962–71. doi:10.1177/1359105314542822.  
56

- 1  
2  
3 428 25 Conner TS, Brookie KL, Richardson AC, et al. On carrots and curiosity: eating fruit and  
4  
5 429 vegetables is associated with greater flourishing in daily life. *Br J Health Psychol*  
6  
7  
8 430 2015;20:413–27. doi:10.1111/bjhp.12113.  
9  
10  
11 431 26 Piko BF, Brassai L. The role of individual and familial protective factors in adolescents' diet  
12  
13  
14 432 control. *J Health Psychol* 2009;14:810–9. doi:10.1177/1359105309338971.  
15  
16  
17 433 27 Irving J, Davis S, Collier A. Aging with purpose: systematic search and review of literature  
18  
19  
20 434 pertaining to older adults and purpose. *Int J Aging Hum Dev* 2017;85:403–37.  
21  
22 435 doi:10.1177/0091415017702908.  
23  
24  
25 436 28 Boylan JM, Tsenkova VK, Miyamoto Y, et al. Psychological resources and glucoregulation in  
26  
27  
28 437 Japanese adults: findings from MIDJA. *Health Psychol* 2017;36:449–57. doi:  
29  
30 438 10.1037/hea0000455.  
31  
32  
33  
34 439 29 Tsenkova VK, Love GD, Singer BH, et al. Socioeconomic status and psychological well-being  
35  
36  
37 440 predict cross-time change in glycosylated hemoglobin in older women without diabetes.  
38  
39  
40 441 *Psychosom Med* 2007;69:777–84. doi:10.1097/PSY.0b013e318157466f.  
41  
42  
43 442 30 Carroll S. Spirituality and purpose in life in alcoholism recovery. *J Stud Alcohol* 1993;54:297–  
44  
45 443 301. doi:10.15288/jsa.1993.54.297.  
46  
47  
48 444 31 Harlow LL, Newcomb MD, Bentler PM. Depression, self-derogation, substance use, and suicide  
49  
50  
51 445 ideation: lack of purpose in life as a mediational factor. *J Clin Psychol* 1986;42:5–21.  
52  
53  
54 446 doi:10.1002/1097-4679(198601)42:13.0.CO;2-9.  
55  
56  
57  
58  
59  
60

- 1  
2  
3 447 32 Martin RA, MacKinnon S, Johnson J, et al. Purpose in life predicts treatment outcome among  
4  
5 448 adult cocaine abusers in treatment. *J Subst Abuse Treat* 2011;40:183–8.  
6  
7  
8 449 doi:10.1016/j.jsat.2010.10.002.  
9  
10  
11 450 33 Robinson EA, Cranford JA, Webb JR, et al. Six-month changes in spirituality, religiousness, and  
12  
13  
14 451 heavy drinking in a treatment-seeking sample. *J Stud Alcohol Drugs* 2007;68:282–90.  
15  
16 452 doi:10.15288/jsad.2007.68.282.  
17  
18  
19 453 34 Smith PH, Bessette AJ, Weinberger AH, et al. Sex/gender differences in smoking cessation: a  
20  
21  
22 454 review. *Prev Med* 2016;92:135–40. doi:10.1016/j.ypmed.2016.07.013.  
23  
24  
25 455 35 Cepeda-Benito A, Reynoso JT, Erath S. Meta-analysis of the efficacy of nicotine replacement  
26  
27  
28 456 therapy for smoking cessation: differences between men and women. *J Consult Clin Psychol*  
29  
30  
31 457 2004;72:712–22. doi:10.1037/0022-006X.72.4.712.  
32  
33  
34 458 36 Heckman CJ, Egleston BL, Hofmann MT. Efficacy of motivational interviewing for smoking  
35  
36  
37 459 cessation: a systematic review and meta-analysis. *Tob Control* 2010;19:410–6. doi:  
38  
39 460 10.1136/tc.2009.033175.  
40  
41  
42 461 37 Konkolöy Thege B, Bachner YG, Martos T, et al. Meaning in life: does it play a role in smoking?  
43  
44  
45 462 *Subst Use Misuse* 2009;44:1566–77. doi:10.1080/10826080802495096.  
46  
47  
48 463 38 Anda RF, Williamson DF, Escobedo LG, et al. Depression and the dynamics of smoking: a  
49  
50  
51 464 national perspective. *JAMA* 1990;264:1541–5. doi:10.1001/jama.1990.03450120053028.  
52  
53  
54 465 39 Boden, JM, Fergusson DM, Horwood LJ. Cigarette smoking and depression: tests of causal  
55  
56  
57  
58  
59  
60

- 1  
2  
3 466 linkages using a longitudinal birth cohort. *Br J Psychiatry* 2010;196:440–6.  
4  
5 467 doi:10.1192/bjp.bp.109.065912.  
6  
7  
8 468 40 Breslau N, Peterson EL, Schultz LR, et al. Major depression and stages of smoking: a longitudinal  
9  
10  
11 469 investigation. *Arch Gen Psychiatry* 1998;55:161–6. doi:10.1097/PSY.0b013e3181a5a7c0.  
12  
13  
14 470 41 Glassman AH, Helzer JE, Covey LS, et al. Smoking, smoking cessation, and major depression.  
15  
16  
17 471 *JAMA* 1990;264:1546–9. doi:10.1001/jama.1990.03450120058029.  
18  
19  
20 472 42 Kendler KS, Neale MC, MacLean CJ, et al. Smoking and major depression: a causal analysis.  
21  
22  
23 473 *Arch Gen Psychiatry* 1993;50:36–43. doi:10.1001/archpsyc.1993.01820130038007.  
24  
25  
26 474 43 Lawrence D, Mitrou F, Zubrick SR. Smoking and mental illness: results from population surveys  
27  
28  
29 475 in Australia and the United States. *BMC Public Health* 2009;9:285.  
30  
31 476 doi:10.1186/1471-2458-9-285.  
32  
33  
34 477 44 Leung J, Gartner C, Hall W, et al. A longitudinal study of the bi-directional relationship between  
35  
36  
37 478 tobacco smoking and psychological distress in a community sample of young Australian  
38  
39  
40 479 women. *Psychol Med* 2012;42:1273–82. doi:10.1017/S0033291711002261.  
41  
42  
43 480 45 Moylan S, Jacka FN, Pasco JA. Cigarette smoking, nicotine dependence and anxiety disorders: a  
44  
45  
46 481 systematic review of population-based, epidemiological studies. *BMC Med* 2012;10:123.  
47  
48  
49 482 doi:10.1186/1741-7015-10-123.  
50  
51  
52 483 46 Pinquart M. Creating and maintaining purpose in life in old age: a meta-analysis. *Ageing Int*  
53  
54 484 2002;27:90–114. doi:10.1007/s12126-002-1004-2.  
55  
56  
57  
58  
59  
60

- 1  
2  
3 485 47 Zika S, Chamberlain K. On the relation between meaning in life and psychological well-being. *Br*  
4  
5 486 *J Psychol* 1992;83:133–45. doi:10.1111/j.2044-8295.1992.tb02429.x.  
6  
7  
8 487 48 Kanata S, Koike S, Ando S, et al. Enuresis and hyperactivity-inattention in early adolescence:  
9  
10 Findings from a population-based survey in Tokyo (Tokyo Early Adolescence Survey). *PLoS*  
11 488 *One* 2016;11:e0158786. doi:10.1371/journal.pone.0158786.  
12  
13  
14 489  
15  
16 490 49 Yamasaki S, Ando S, Koike S, et al. Dissociation mediates the relationship between peer  
17  
18 victimization and hallucinatory experiences among early adolescents. *Schizophr Res Cogn*  
19 491  
20 2016;4:18–23. doi:10.1016/j.scog.2016.04.001.  
21  
22  
23 492  
24  
25 493 50 Kessler RC, Andrews G, Colpe LJ, et al. Short screening scales to monitor population prevalences  
26  
27 and trends in non-specific psychological distress. *Psychol Med*; 2002;32, 959–76.  
28 494  
29 doi:10.1017/S0033291702006074.  
30  
31 495  
32  
33 496 51 Amos A. Women and smoking. *Br Med Bull* 1996;52:74–89.  
34  
35  
36 497 52 David A, Esson K, Perucic AM, et al. Tobacco use: equity and social determinants. In: Blas E,  
37  
38 Kurup AS, eds. *Equity, Social Determinants and Public Health Programmes*. Geneva: World  
39 498  
40 Health Organization 2010  
41  
42 499  
43  
44 500 53 Hiscock R, Bauld L, Amos A, et al. Socioeconomic status and smoking: a review. *Ann N Y Acad*  
45  
46 *Sci* 2012;1248:107–23. doi:10.1111/j.1749-6632.2011.06202.x.  
47  
48 501  
49  
50 502 54 Laaksonen M, Rahkonen O, Karvonen S, et al. Socioeconomic status and smoking. *Eur J Public*  
51  
52 *Health* 2005;15:262–9. doi:10.1093/eurpub/cki115.  
53  
54 503  
55  
56  
57  
58  
59  
60



- 1  
2  
3 504 55 Keyes CL. The mental health continuum: from languishing to flourishing in life. *J Health Soc*  
4  
5 505 *Behav* 2002;43:207–22. doi:10.2307/3090197.  
6  
7  
8 506 56 Keyes, CL. Mental illness and/or mental health? Investigating axioms of the complete state model  
9  
10  
11 507 of health. *J Consult Clin Psychol* 2005;73:539–48. doi:10.1037/0022-006X.73.3.539.  
12  
13  
14 508 57 Ryff CD. Psychological well-being revisited: advances in the science and practice of eudaimonia.  
15  
16  
17 509 *Psychother Psychosom* 2014;83:10–28. doi:10.1159/000353263.  
18  
19  
20 510 58 Ryff CD. The benefits of purposeful life engagement on later-life physical function. *JAMA*  
21  
22 511 *Psychiatry* 2017;74:1046–7. doi:10.1001/jamapsychiatry.2017.2136.  
23  
24  
25 512 59 Dolan SL, Rohsenow DJ, Martin RA, et al. Urge-specific and lifestyle coping strategies of  
26  
27  
28 513 alcoholics: relationships of specific strategies to treatment outcome. *Drug Alcohol Depend*  
29  
30  
31 514 2013;128:8–14. doi:10.1016/j.drugalcdep.2012.07.010.  
32  
33  
34 515 60 Miller WR, Rollnick S. Motivational Interviewing: Helping People Change, third ed. New York:  
35  
36  
37 516 Guilford Press 2012  
38  
39  
40 517 61 Sutipan P, Intarakamhang U, Macaskill A. The impact of positive psychological interventions on  
41  
42  
43 518 well-being in healthy elderly people. *J Happiness Stud* 2016;18:269–91.  
44  
45  
46 519 doi:10.1007/s10902-015-9711-z.  
47  
48  
49 520 62 Weiss LA, Westerhof GJ, Bohlmeijer ET. Can we increase psychological well-being? The effects  
50  
51  
52 521 of interventions on psychological well-being: a meta-analysis of randomized controlled trials.  
53  
54 522 *PloS One* 2016;11:e0158092. doi:10.1371/journal.pone.0158092.  
55  
56  
57  
58  
59  
60

1  
2  
3 523 63 Friedman EM, Ruini C, Foy R, et al. Lighten UP! A community-based group intervention to  
4  
5 524 promote psychological well-being in older adults. *Aging Ment Health* 2017;21:199–205.  
6  
7  
8 525 doi:10.1080/13607863.2015.1093605.  
9

10  
11 526 64 Rindfuss RR, Choe MK, Tsuya NO, et al. Do low survey response rates bias results? Evidence  
12  
13  
14 527 from Japan. *Demographic Res* 2015;32:797–828. doi: 10.4054/DemRes.2015.32.26.  
15  
16  
17  
18  
19  
20  
21  
22  
23  
24  
25  
26  
27  
28  
29  
30  
31  
32  
33  
34  
35  
36  
37  
38  
39  
40  
41  
42  
43  
44  
45  
46  
47  
48  
49  
50  
51  
52  
53  
54  
55  
56  
57  
58  
59  
60

**Table 1. Descriptive statistics for T-EAS variables broken down by tobacco use**

|                                                 | Non-smokers | Light smokers | Moderate to heavy smokers | <i>p</i> |
|-------------------------------------------------|-------------|---------------|---------------------------|----------|
| N (%)                                           | 3739 (92.0) | 204 (5.0)     | 120 (3.0)                 |          |
| Purpose in Life, mean (standard deviation [SD]) | 57.3 (9.7)  | 54.8 (9.8)    | 52.6 (9.9)                | <.001    |
| Age, mean (SD)                                  | 42.0 (4.1)  | 41.2 (5.0)    | 40.5 (4.8)                | <.001    |
| Education, n (%)                                |             |               |                           |          |
| Junior high school or lower                     | 22 (0.6)    | 12 (5.9)      | 9 (7.5)                   | <.001    |
| High school                                     | 512 (13.7)  | 66 (32.4)     | 48 (40.0)                 |          |
| Technical or junior college                     | 1626 (43.5) | 89 (43.6)     | 51 (42.5)                 |          |
| 4-year university or higher                     | 1579 (42.2) | 37 (18.1)     | 12 (10.0)                 |          |
| Marital status, n (%)                           |             |               |                           |          |
| Yes                                             | 3613 (96.6) | 182 (89.2)    | 97 (80.8)                 | <.001    |
| No                                              | 126 (3.4)   | 22 (10.8)     | 23 (19.2)                 |          |
| Family annual income, n (%)                     |             |               |                           |          |
| Less than 4 million yen                         | 285 (7.6)   | 42 (20.6)     | 31 (25.8)                 | <.001    |
| 4–6 million yen                                 | 1022 (27.3) | 74 (36.3)     | 57 (47.5)                 |          |
| 7–9 million yen                                 | 1162 (31.1) | 55 (27.0)     | 21 (17.5)                 |          |
| More than 10 million yen                        | 1270 (34.0) | 33 (16.2)     | 11 (9.2)                  |          |
| Alcohol use, n (%)                              |             |               |                           |          |
| Non                                             | 1160 (31.0) | 44 (21.6)     | 43 (35.8)                 | <.001    |
| Less than once a month                          | 563 (15.1)  | 35 (17.2)     | 9 (7.5)                   |          |
| 2–4 times a month                               | 689 (18.4)  | 24 (11.8)     | 15 (12.5)                 |          |
| 2–3 times a week                                | 594 (15.9)  | 21 (10.3)     | 16 (13.3)                 |          |
| More than 4 times a week                        | 733 (19.6)  | 80 (39.2)     | 37 (30.8)                 |          |
| K6 (Psychological Distress), mean (SD)          | 2.9 (3.3)   | 3.4 (3.4)     | 3.5 (3.9)                 | .026     |

**Table 2. Correlation coefficients among all variables.**

|                               | 1 | 2                | 3                | 4                | 5                | 6                | 7               | 8                            |
|-------------------------------|---|------------------|------------------|------------------|------------------|------------------|-----------------|------------------------------|
| 1 PIL                         | - | <b>-0.092***</b> | <b>0.034*</b>    | <b>0.147***</b>  | 0.006            | <b>0.138***</b>  | 0.013           | <b>-0.342***<sup>a</sup></b> |
| 2 Tobacco consumption         |   | -                | <b>-0.067***</b> | <b>-0.203***</b> | <b>-0.144***</b> | <b>-0.172***</b> | <b>0.065***</b> | <b>0.038*</b>                |
| 3 Age                         |   |                  | -                | <b>0.048**</b>   | 0.030            | <b>0.143***</b>  | 0.020           | <b>0.055***</b>              |
| 4 Education                   |   |                  |                  | -                | <b>0.076***</b>  | <b>0.323***</b>  | -0.019          | -0.023                       |
| 5 Marital status              |   |                  |                  |                  | -                | <b>0.257***</b>  | -0.003          | <b>-0.054***</b>             |
| 6 Family annual income        |   |                  |                  |                  |                  | -                | 0.021           | <b>-0.048**</b>              |
| 7 Alcohol use                 |   |                  |                  |                  |                  |                  | -               | -0.006                       |
| 8 Psychological distress (K6) |   |                  |                  |                  |                  |                  |                 | -                            |

Spearman's rank correlation coefficients except a correlation between continuous variables (PIL and K6; a: pearson correlation coefficient)

\*\*\* p < .001, \*\* p < .01, \* p < .05

**Table 3. Logistic regression coefficients for odds of tobacco use, with and without potential confounding variables**

|                        | Model 1          |          | Model 2          |          | Model 3          |          | Model 4          |          |
|------------------------|------------------|----------|------------------|----------|------------------|----------|------------------|----------|
|                        | OR [95% CI]      | <i>p</i> |
| Purpose in Life        | 0.71 [0.63-0.80] | <.001    | 0.81 [0.71-0.91] | .001     | 0.80 [0.71-0.91] | <.001    | 0.80 [0.70-0.91] | .001     |
| Age                    |                  |          | 0.98 [0.95-1.00] | .061     | 0.97 [0.95-1.00] | .043     | 0.97 [0.95-1.00] | .044     |
| Education              |                  |          | 0.44 [0.38-0.52] | <.001    | 0.45 [0.38-0.52] | <.001    | 0.45 [0.38-0.52] | <.001    |
| Marital Status         |                  |          | 0.41 [0.27-0.62] | <.001    | 0.41 [0.27-0.63] | <.001    | 0.41 [0.27-0.63] | <.001    |
| Family Income          |                  |          | 0.71 [0.62-0.82] | <.001    | 0.71 [0.62-0.81] | <.001    | 0.71 [0.62-0.81] | <.001    |
| Alcohol Use            |                  |          |                  |          | 1.18 [1.10-1.28] | <.001    | 1.18 [1.10-1.28] | <.001    |
| Psychological Distress |                  |          |                  |          |                  |          | 1.00 [0.96-1.04] | .974     |

529 OR: odds ratio, CI: confidence interval

1  
2  
3 530 **Figure Captions**  
4

5 531 Figure 1  
6  
7

8 532  
9

10  
11 533 **Figure 1. Odds ratios for purpose in life from multinomial logistic regression analysis**

12  
13  
14 534 **predicting smoking consumption (reference: non-smoker) with and without potential**

15  
16  
17 535 **confounding variables.**  
18

19  
20 536  
21

22 537 Model 5: without any adjustment; Model 6: adjusting for socioeconomic covariates (educational

23  
24  
25 538 attainment and family income); Model 7: adjusting for socioeconomic covariates and alcohol

26  
27  
28 539 consumption; Model 8: adjusting for socioeconomic covariates, alcohol consumption and

29  
30  
31 540 psychological distress. OR: Odds ratio.  
32  
33  
34  
35  
36  
37  
38  
39  
40  
41  
42  
43  
44  
45  
46  
47  
48  
49  
50  
51  
52  
53  
54  
55  
56  
57  
58  
59  
60

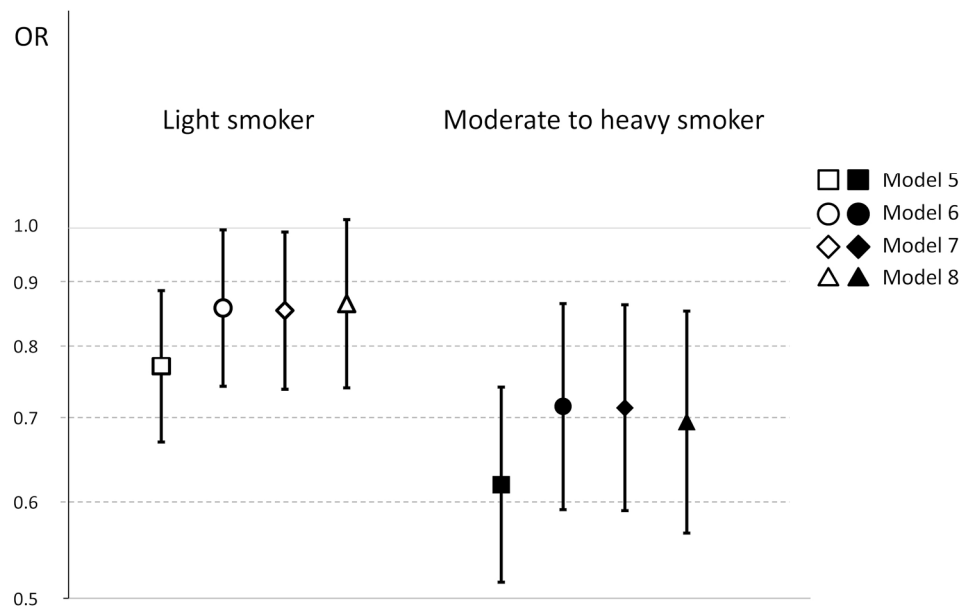

**Figure 1. Odds ratios for purpose in life from multinomial logistic regression analysis predicting smoking consumption (reference: non-smoker) with and without potential confounding variables.**

Model 5: without any adjustment; Model 6: adjusting for socioeconomic covariates (educational attainment and family income); Model 7: adjusting for socioeconomic covariates and alcohol consumption; Model 8: adjusting for socioeconomic covariates, alcohol consumption and psychological distress. OR: Odds ratio.

99x64mm (600 x 600 DPI)

## STROBE Statement—checklist of items that should be included in reports of observational studies

|                              | Item No | Recommendation                                                                                                                                                                             | Page No. |   |
|------------------------------|---------|--------------------------------------------------------------------------------------------------------------------------------------------------------------------------------------------|----------|---|
| <b>Title and abstract</b>    | 1       | (a) Indicate the study's design with a commonly used term in the title or the abstract                                                                                                     | 1,3      |   |
|                              |         | (b) Provide in the abstract an informative and balanced summary of what was done and what was found                                                                                        | 3-4      |   |
| <b>Introduction</b>          |         |                                                                                                                                                                                            |          |   |
| Background/<br>rationale     | 2       | Explain the scientific background and rationale for the investigation being reported                                                                                                       | 6-8      |   |
| Objectives                   | 3       | State specific objectives, including any prespecified hypotheses                                                                                                                           | 6-8      |   |
| <b>Methods</b>               |         |                                                                                                                                                                                            |          |   |
| Study design                 | 4       | Present key elements of study design early in the paper                                                                                                                                    | 8-9      |   |
| Setting                      | 5       | Describe the setting, locations, and relevant dates, including periods of recruitment, exposure, follow-up, and data collection                                                            | 8-9      |   |
| Participants                 | 6       | (a) <i>Cohort study</i> —Give the eligibility criteria, and the sources and methods of selection of participants. Describe methods of follow-up                                            | 8-9      |   |
|                              |         | <i>Case-control study</i> —Give the eligibility criteria, and the sources and methods of case ascertainment and control selection. Give the rationale for the choice of cases and controls |          |   |
|                              |         | <i>Cross-sectional study</i> —Give the eligibility criteria, and the sources and methods of selection of participants                                                                      |          |   |
|                              |         | (b) <i>Cohort study</i> —For matched studies, give matching criteria and number of exposed and unexposed                                                                                   |          | - |
|                              |         | <i>Case-control study</i> —For matched studies, give matching criteria and the number of controls per case                                                                                 |          |   |
| Variables                    | 7       | Clearly define all outcomes, exposures, predictors, potential confounders, and effect modifiers. Give diagnostic criteria, if applicable                                                   | 9-11     |   |
| Data sources/<br>measurement | 8*      | For each variable of interest, give sources of data and details of methods of assessment (measurement). Describe comparability of assessment methods if there is more than one group       | 9-11     |   |
| Bias                         | 9       | Describe any efforts to address potential sources of bias                                                                                                                                  | 8-9      |   |
| Study size                   | 10      | Explain how the study size was arrived at                                                                                                                                                  | 9        |   |
| Quantitative<br>variables    | 11      | Explain how quantitative variables were handled in the analyses. If applicable, describe which groupings were chosen and why                                                               | 9-12     |   |
| Statistical<br>methods       | 12      | (a) Describe all statistical methods, including those used to control for confounding                                                                                                      | 11-12    |   |
|                              |         | (b) Describe any methods used to examine subgroups and interactions                                                                                                                        | -        |   |
|                              |         | (c) Explain how missing data were addressed                                                                                                                                                | 9        |   |
|                              |         | (d) <i>Cohort study</i> —If applicable, explain how loss to follow-up was addressed                                                                                                        | -        |   |
|                              |         | <i>Case-control study</i> —If applicable, explain how matching of cases and controls was addressed                                                                                         |          |   |
|                              |         | <i>Cross-sectional study</i> —If applicable, describe analytical methods taking account of sampling strategy                                                                               |          |   |
|                              |         | (e) Describe any sensitivity analyses                                                                                                                                                      | -        |   |

Continued on next page



1  
2  
3  
4  
5  
6  
7  
8  
9  
10  
11  
12  
13  
14  
15  
16  
17  
18  
19  
20  
21  
22  
23  
24  
25  
26  
27  
28  
29  
30  
31  
32  
33  
34  
35  
36  
37  
38  
39  
40  
41  
42  
43  
44  
45  
46  
47  
48  
49  
50  
51  
52  
53  
54  
55  
56  
57  
58  
59  
60**Results**

|                  |     |                                                                                                                                                                                                              |                              |
|------------------|-----|--------------------------------------------------------------------------------------------------------------------------------------------------------------------------------------------------------------|------------------------------|
| Participants     | 13* | (a) Report numbers of individuals at each stage of study—eg numbers potentially eligible, examined for eligibility, confirmed eligible, included in the study, completing follow-up, and analysed            | 12-13<br>Table 1             |
|                  |     | (b) Give reasons for non-participation at each stage                                                                                                                                                         | -                            |
|                  |     | (c) Consider use of a flow diagram                                                                                                                                                                           | -                            |
| Descriptive data | 14* | (a) Give characteristics of study participants (eg demographic, clinical, social) and information on exposures and potential confounders                                                                     | 12-13<br>Table 1             |
|                  |     | (b) Indicate number of participants with missing data for each variable of interest                                                                                                                          | -                            |
|                  |     | (c) <i>Cohort study</i> —Summarise follow-up time (eg, average and total amount)                                                                                                                             | -                            |
| Outcome data     | 15* | <i>Cohort study</i> —Report numbers of outcome events or summary measures over time                                                                                                                          | -                            |
|                  |     | <i>Case-control study</i> —Report numbers in each exposure category, or summary measures of exposure                                                                                                         | -                            |
|                  |     | <i>Cross-sectional study</i> —Report numbers of outcome events or summary measures                                                                                                                           | 12-13<br>Table 1             |
| Main results     | 16  | (a) Give unadjusted estimates and, if applicable, confounder-adjusted estimates and their precision (eg, 95% confidence interval). Make clear which confounders were adjusted for and why they were included | 13-14<br>Table 2<br>Figure 1 |
|                  |     | (b) Report category boundaries when continuous variables were categorized                                                                                                                                    | 12-13<br>Table 1             |
|                  |     | (c) If relevant, consider translating estimates of relative risk into absolute risk for a meaningful time period                                                                                             | -                            |
| Other analyses   | 17  | Report other analyses done—eg analyses of subgroups and interactions, and sensitivity analyses                                                                                                               | -                            |

**Discussion**

|                  |    |                                                                                                                                                                            |       |
|------------------|----|----------------------------------------------------------------------------------------------------------------------------------------------------------------------------|-------|
| Key results      | 18 | Summarise key results with reference to study objectives                                                                                                                   | 15    |
| Limitations      | 19 | Discuss limitations of the study, taking into account sources of potential bias or imprecision. Discuss both direction and magnitude of any potential bias                 | 16    |
| Interpretation   | 20 | Give a cautious overall interpretation of results considering objectives, limitations, multiplicity of analyses, results from similar studies, and other relevant evidence | 15-17 |
| Generalisability | 21 | Discuss the generalisability (external validity) of the study results                                                                                                      | 16-17 |

**Other information**

|         |    |                                                                                                                                                               |       |
|---------|----|---------------------------------------------------------------------------------------------------------------------------------------------------------------|-------|
| Funding | 22 | Give the source of funding and the role of the funders for the present study and, if applicable, for the original study on which the present article is based | 17-18 |
|---------|----|---------------------------------------------------------------------------------------------------------------------------------------------------------------|-------|

\*Give information separately for cases and controls in case-control studies and, if applicable, for exposed and unexposed groups in cohort and cross-sectional studies.

**Note:** An Explanation and Elaboration article discusses each checklist item and gives methodological background and published examples of transparent reporting. The STROBE checklist is best used in conjunction with this article (freely available on the Web sites of PLoS Medicine at <http://www.plosmedicine.org/>, Annals of Internal Medicine at <http://www.annals.org/>, and Epidemiology at <http://www.epidem.com/>). Information on the STROBE Initiative is available at [www.strobe-statement.org](http://www.strobe-statement.org).
